# Supplementary material for: Same but different: structural diversity of cytidine 5′-monophosphate (CMP) (an)hydrates
Source: Royal Society of Chemistry journal article supplement (doi:10.1039/d4ce00965g), 2025-01-01
Supplement: d4ce00965g1.pdf [file d4ce00965g1.pdf]

## Supplementary Information

*Same but different: structural diversity of cytidine 5'-  
monophosphate (CMP) (an)hydrates*

Oskar Kaszubowski<sup>a\*</sup>, Katarzyna Ślepokura<sup>a</sup>, Jakub Wojciechowski<sup>b</sup>

<sup>a</sup> University of Wrocław, Faculty of Chemistry, 14. F. Joliot-Curie, 50-383 Wrocław, Poland

<sup>b</sup> Rigaku Europe SE, 167 Hugentottenallee, 63263 Neu-Isenburg, Germany

\* Corresponding author; email: oskar.kaszubowski@uwr.edu.pl

## TABLE OF CONTENTS

### EXPERIMENTAL

|                                                                                        |   |
|----------------------------------------------------------------------------------------|---|
| Table S1. Crystal data, experimental and refinement details for triclinic crystals.    | 3 |
| Table S2. Crystal data, experimental and refinement details for monoclinic crystals.   | 4 |
| Table S3. Crystal data, experimental and refinement details for orthorhombic crystals. | 5 |

### RESULTS AND DISCUSSION

|                                                                                                          |       |
|----------------------------------------------------------------------------------------------------------|-------|
| Figure S1. Comparison of powder diffraction patterns of monoclinic monohydrates.                         | 6     |
| Figures S2–S11. Asymmetric units of all crystal structures.                                              | 7–16  |
| Table S4. P–O bonds lengths and selected valence angles and torsion angles values.                       | 17    |
| Figures S12–S14. TGA/DTA curves of triclinic, monoclinic and orthorhombic crystals.                      | 18–20 |
| Figure S15. Diffraction pattern of LT and HT phases of orthorhombic CMP·1.5H <sub>2</sub> O crystal.     | 21    |
| Figures S16–S17. Supramolecular motifs formed by cytosine and phosphate.                                 | 22–23 |
| Tables S5–S14. Geometric parameters of the hydrogen bonds.                                               | 24–29 |
| Table S15. Geometric details of lp··· $\pi$ interactions.                                                | 30    |
| Figure S18–S20. Hirshfeld surface and 2D fingerprint plots of the CMP zwitterions in anhydrous crystals. | 31–33 |
| Figure S21. Conformation of CMP zwitterions.                                                             | 34    |

**Table S1.** Crystal data, experimental and refinement details for triclinic crystals.

|                                                                            | CMP·2H <sub>2</sub> O (I)                                                        | CMP·H <sub>2</sub> O (II)                                                       | CMP·0.5H <sub>2</sub> O (III)                                                      | CMP (IV)                                                       |
|----------------------------------------------------------------------------|----------------------------------------------------------------------------------|---------------------------------------------------------------------------------|------------------------------------------------------------------------------------|----------------------------------------------------------------|
| Chemical formula                                                           | C <sub>9</sub> H <sub>14</sub> N <sub>3</sub> O <sub>8</sub> P·2H <sub>2</sub> O | C <sub>9</sub> H <sub>14</sub> N <sub>3</sub> O <sub>8</sub> P·H <sub>2</sub> O | C <sub>9</sub> H <sub>14</sub> N <sub>3</sub> O <sub>8</sub> P·0.5H <sub>2</sub> O | C <sub>9</sub> H <sub>14</sub> N <sub>3</sub> O <sub>8</sub> P |
| $M_r$                                                                      | 359.23                                                                           | 341.22                                                                          | 332.21                                                                             | 323.20                                                         |
| Crystal system                                                             | Triclinic                                                                        | Triclinic                                                                       | Triclinic                                                                          | Triclinic                                                      |
| Space group                                                                | <i>P</i> 1                                                                       | <i>P</i> 1                                                                      | <i>P</i> 1                                                                         | <i>P</i> 1                                                     |
| $a, b, c$ (Å)                                                              | 4.8019(6),<br>8.3731(9),<br>9.5127(15)                                           | 4.7963(8),<br>8.247(3),<br>9.040(3)                                             | 4.7974(8),<br>8.2932(10),<br>16.861(3)                                             | 4.7896(8),<br>8.1312(14),<br>8.4477(12)                        |
| $\alpha, \beta, \gamma$ (°)                                                | 76.71(2),<br>80.38(2),<br>86.60(2)                                               | 70.65(2),<br>86.70(3),<br>84.89(2)                                              | 101.48(2),<br>92.04(2),<br>95.55(2)                                                | 76.85(2),<br>79.75(2),<br>83.99(2)                             |
| $V$ (Å <sup>3</sup> )                                                      | 366.91(9)                                                                        | 335.89(18)                                                                      | 653.29(18)                                                                         | 314.55(9)                                                      |
| $Z$                                                                        | 1                                                                                | 1                                                                               | 2                                                                                  | 1                                                              |
| Radiation type                                                             | Cu $K\alpha$                                                                     | Cu $K\alpha$                                                                    | Cu $K\alpha$                                                                       | Cu $K\alpha$                                                   |
| T (K)                                                                      | 100                                                                              | 100                                                                             | 100                                                                                | 100                                                            |
| $\mu$ (mm <sup>-1</sup> )                                                  | 2.25                                                                             | 2.37                                                                            | 2.39                                                                               | 2.43                                                           |
| Crystal size (mm)                                                          | 0.10 × 0.04 × 0.01                                                               | 0.08 × 0.03 × 0.02                                                              | 0.10 × 0.04 × 0.01                                                                 | 0.06 × 0.03 × 0.03                                             |
| $D_c$ (g·cm <sup>-3</sup> )                                                | 1.626                                                                            | 1.687                                                                           | 1.689                                                                              | 1.706                                                          |
| Correction for absorption effect                                           | Multi-scan                                                                       | Multi-scan                                                                      | Multi-scan                                                                         | Gaussian                                                       |
| $T_{\min}, T_{\max}$                                                       | 0.948, 1.000                                                                     | 0.889, 1.000                                                                    | 0.797, 1.000                                                                       | 0.915, 0.996                                                   |
| No. of measured, independent and observed [ $I > 2\sigma(I)$ ] reflections | 4863, 2088, 2060                                                                 | 3244, 1600, 1215                                                                | 6382, 3095, 2725                                                                   | 3810, 1640, 1592                                               |
| $R_{\text{int}}$                                                           | 0.014                                                                            | 0.033                                                                           | 0.031                                                                              | 0.021                                                          |
| $(\sin \theta/\lambda)_{\text{max}}$ (Å <sup>-1</sup> )                    | 0.626                                                                            | 0.592                                                                           | 0.628                                                                              | 0.624                                                          |
| $R[F^2 > 2\sigma(F^2)], wR(F^2), S$                                        | 0.027, 0.075, 1.06                                                               | 0.098, 0.285, 1.17                                                              | 0.074, 0.206, 1.06                                                                 | 0.049, 0.137, 1.10                                             |
| No. of reflections                                                         | 2088                                                                             | 1600                                                                            | 3095                                                                               | 1640                                                           |
| No. of parameters                                                          | 217                                                                              | 203                                                                             | 396                                                                                | 194                                                            |
| No. of restraints                                                          | 10                                                                               | 12                                                                              | 6                                                                                  | 3                                                              |
| $\Delta\rho_{\text{max}}, \Delta\rho_{\text{min}}$ (e Å <sup>-3</sup> )    | 0.35, -0.39                                                                      | 0.98, -0.59                                                                     | 0.90, -0.61                                                                        | 0.56, -0.50                                                    |
| Flack Parameter                                                            | -0.01(2)                                                                         | -0.18(12)                                                                       | 0.16(5)                                                                            | 0.03(4)                                                        |
| CCDC No.                                                                   | 2385027                                                                          | 2385028                                                                         | 2385029                                                                            | 2385030                                                        |

**Table S2.** Crystal data, experimental and refinement details for monoclinic crystals.

| CMP (VI)                                                                   |                                                                |
|----------------------------------------------------------------------------|----------------------------------------------------------------|
| Chemical formula                                                           | C <sub>9</sub> H <sub>14</sub> N <sub>3</sub> O <sub>8</sub> P |
| $M_r$                                                                      | 323.20                                                         |
| Crystal system                                                             | Monoclinic                                                     |
| Space group                                                                | $P2_1$                                                         |
| $a, b, c$ (Å)                                                              | 4.843(4),<br>8.646(8),<br>15.726(2)                            |
| $\alpha, \beta, \gamma$ (°)                                                | 90,<br>93.68(1),<br>90                                         |
| $V$ (Å <sup>3</sup> )                                                      | 657.1(8)                                                       |
| $Z$                                                                        | 2                                                              |
| Radiation type                                                             | 200 kV electron beam, $\lambda = 0.0251$ Å                     |
| T (K)                                                                      | 100                                                            |
| $D_c$ (g·cm <sup>-3</sup> )                                                | 1.633                                                          |
| No. of measured, independent and observed [ $I > 2\sigma(I)$ ] reflections | 3305, 2214, 1583                                               |
| $R_{int}$                                                                  | 0.126                                                          |
| $(\sin \theta/\lambda)_{max}$ (Å <sup>-1</sup> )                           | 0.625                                                          |
| $R[F^2 > 2\sigma(F^2)], wR(F^2), S$                                        | 0.132, 0.350, 1.15                                             |
| CCDC No.                                                                   | 2385031                                                        |

Selected crystal data for CMP·H<sub>2</sub>O (V) reported at CCDC (WIWZOV<sup>1</sup>):

| CMP·H <sub>2</sub> O (WIWZOV) (V) |                                                                                 |
|-----------------------------------|---------------------------------------------------------------------------------|
| Chemical formula                  | C <sub>9</sub> H <sub>14</sub> N <sub>3</sub> O <sub>8</sub> P·H <sub>2</sub> O |
| $M_r$                             | 341.22                                                                          |
| Crystal system                    | Monoclinic                                                                      |
| Space group                       | $P2_1$                                                                          |
| $a, b, c$ (Å)                     | 4.8521(1),<br>8.2910(2),<br>17.0486(5)                                          |
| $\alpha, \beta, \gamma$ (°)       | 90,<br>90.465(2),<br>90                                                         |
| $V$ (Å <sup>3</sup> )             | 685.82(3)                                                                       |
| $Z$                               | 2                                                                               |
| T (K)                             | 150                                                                             |

**Table S3.** Crystal data, experimental and refinement details for orthorhombic crystals.

|                                                                                                                | CMP·1.5H <sub>2</sub> O<br>(VII LT)                                                | CMP·1.5H <sub>2</sub> O<br>(VII HT)                                                | CMP·H <sub>2</sub> O (VIII)                                                     | CMP (IX)                                                       |
|----------------------------------------------------------------------------------------------------------------|------------------------------------------------------------------------------------|------------------------------------------------------------------------------------|---------------------------------------------------------------------------------|----------------------------------------------------------------|
| Chemical formula                                                                                               | C <sub>9</sub> H <sub>14</sub> N <sub>3</sub> O <sub>8</sub> P·1.5H <sub>2</sub> O | C <sub>9</sub> H <sub>14</sub> N <sub>3</sub> O <sub>8</sub> P·1.5H <sub>2</sub> O | C <sub>9</sub> H <sub>14</sub> N <sub>3</sub> O <sub>8</sub> P·H <sub>2</sub> O | C <sub>9</sub> H <sub>14</sub> N <sub>3</sub> O <sub>8</sub> P |
| <i>M<sub>r</sub></i>                                                                                           | 350.22                                                                             | 350.22                                                                             | 341.22                                                                          | 323.20                                                         |
| Crystal system                                                                                                 | Orthorhombic                                                                       | Orthorhombic                                                                       | Orthorhombic                                                                    | Orthorhombic                                                   |
| Space group                                                                                                    | <i>P</i> 2 <sub>1</sub> 2 <sub>1</sub> 2 <sub>1</sub>                              | <i>P</i> 2 <sub>1</sub> 2 <sub>1</sub> 2                                           | <i>P</i> 2 <sub>1</sub> 2 <sub>1</sub> 2 <sub>1</sub>                           | <i>P</i> 2 <sub>1</sub> 2 <sub>1</sub> 2 <sub>1</sub>          |
| <i>a</i> , <i>b</i> , <i>c</i> (Å)                                                                             | 8.4220(14),<br>35.163(6),<br>9.693(2)                                              | 8.4629(16),<br>35.212(7),<br>4.8658(8)                                             | 8.367(2),<br>34.158(7),<br>4.8236(9)                                            | 8.338(2),<br>31.318(7),<br>4.8912(10)                          |
| <i>α</i> , <i>β</i> , <i>γ</i> (°)                                                                             | 90,<br>90,<br>90                                                                   | 90,<br>90,<br>90                                                                   | 90,<br>90,<br>90                                                                | 90,<br>90,<br>90                                               |
| <i>V</i> (Å <sup>3</sup> )                                                                                     | 2870.5(9)                                                                          | 1450.0(5)                                                                          | 1378.6(5)                                                                       | 1277.2(5)                                                      |
| <i>Z</i>                                                                                                       | 8                                                                                  | 4                                                                                  | 4                                                                               | 4                                                              |
| Radiation type                                                                                                 | Cu <i>Kα</i>                                                                       | Cu <i>Kα</i>                                                                       | Cu <i>Kα</i>                                                                    | Cu <i>Kα</i>                                                   |
| T (K)                                                                                                          | 100                                                                                | 200                                                                                | 100                                                                             | 100                                                            |
| <i>μ</i> (mm <sup>-1</sup> )                                                                                   | 2.26                                                                               | 2.24                                                                               | 2.31                                                                            | 2.40                                                           |
| Crystal size (mm)                                                                                              | 0.14 × 0.13 × 0.02                                                                 | 0.14 × 0.13 × 0.02                                                                 | 0.14 × 0.13 × 0.02                                                              | 0.14 × 0.13 × 0.02                                             |
| <i>D<sub>c</sub></i> (g·cm <sup>-3</sup> )                                                                     | 1.621                                                                              | 1.604                                                                              | 1.644                                                                           | 1.681                                                          |
| Correction for absorption effect                                                                               | Multi-scan                                                                         | Multi-scan                                                                         | Multi-scan                                                                      | Multi-scan                                                     |
| <i>T<sub>min</sub></i> , <i>T<sub>max</sub></i>                                                                | 0.721, 1.000                                                                       | 0.610, 1.000                                                                       | 0.691, 1.000                                                                    | 0.719, 1.000                                                   |
| No. of measured, independent and observed [ <i>I</i> > 2σ( <i>I</i> )] reflections                             | 19770, 5485, 4917                                                                  | 10362, 2812, 2712                                                                  | 10019, 2682, 2598                                                               | 12419, 2594, 2498                                              |
| <i>R<sub>int</sub></i>                                                                                         | 0.025                                                                              | 0.026                                                                              | 0.033                                                                           | 0.043                                                          |
| (sin θ/λ) <sub>max</sub> (Å <sup>-1</sup> )                                                                    | 0.628                                                                              | 0.626                                                                              | 0.628                                                                           | 0.628                                                          |
| <i>R</i> [ <i>F</i> <sup>2</sup> > 2σ( <i>F</i> <sup>2</sup> )], <i>wR</i> ( <i>F</i> <sup>2</sup> ), <i>S</i> | 0.046, 0.146, 1.15                                                                 | 0.042, 0.103, 1.09                                                                 | 0.075, 0.211, 1.12                                                              | 0.120, 0.318, 1.10                                             |
| No. of reflections                                                                                             | 5485                                                                               | 2812                                                                               | 2682                                                                            | 2594                                                           |
| No. of parameters                                                                                              | 422                                                                                | 231                                                                                | 201                                                                             | 194                                                            |
| No. of restraints                                                                                              | 9                                                                                  | 9                                                                                  | 6                                                                               | –                                                              |
| Δρ <sub>max</sub> , Δρ <sub>min</sub> (e Å <sup>-3</sup> )                                                     | 0.48, -0.38                                                                        | 0.55, -0.30                                                                        | 0.72, -0.55                                                                     | 1.31, -0.73                                                    |
| Flack Parameter                                                                                                | -0.004(14)                                                                         | 0.008(11)                                                                          | 0.037(19)                                                                       | 0.105(16)                                                      |
| CCDC No.                                                                                                       | 2385032                                                                            | 2385033                                                                            | 2385034                                                                         | 2385035                                                        |

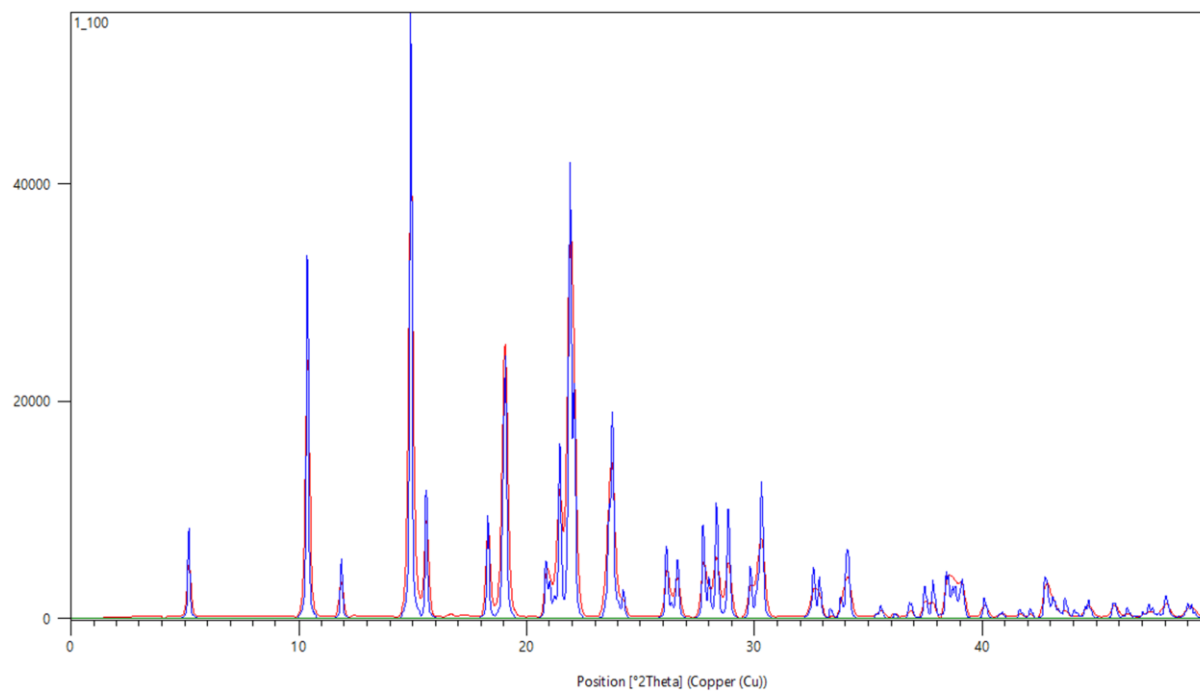

**Figure S1.** Comparison of experimental powder diffraction pattern of commercially available (red) and simulated powder diffraction pattern of WIWZOV (blue) monoclinic monohydrate.

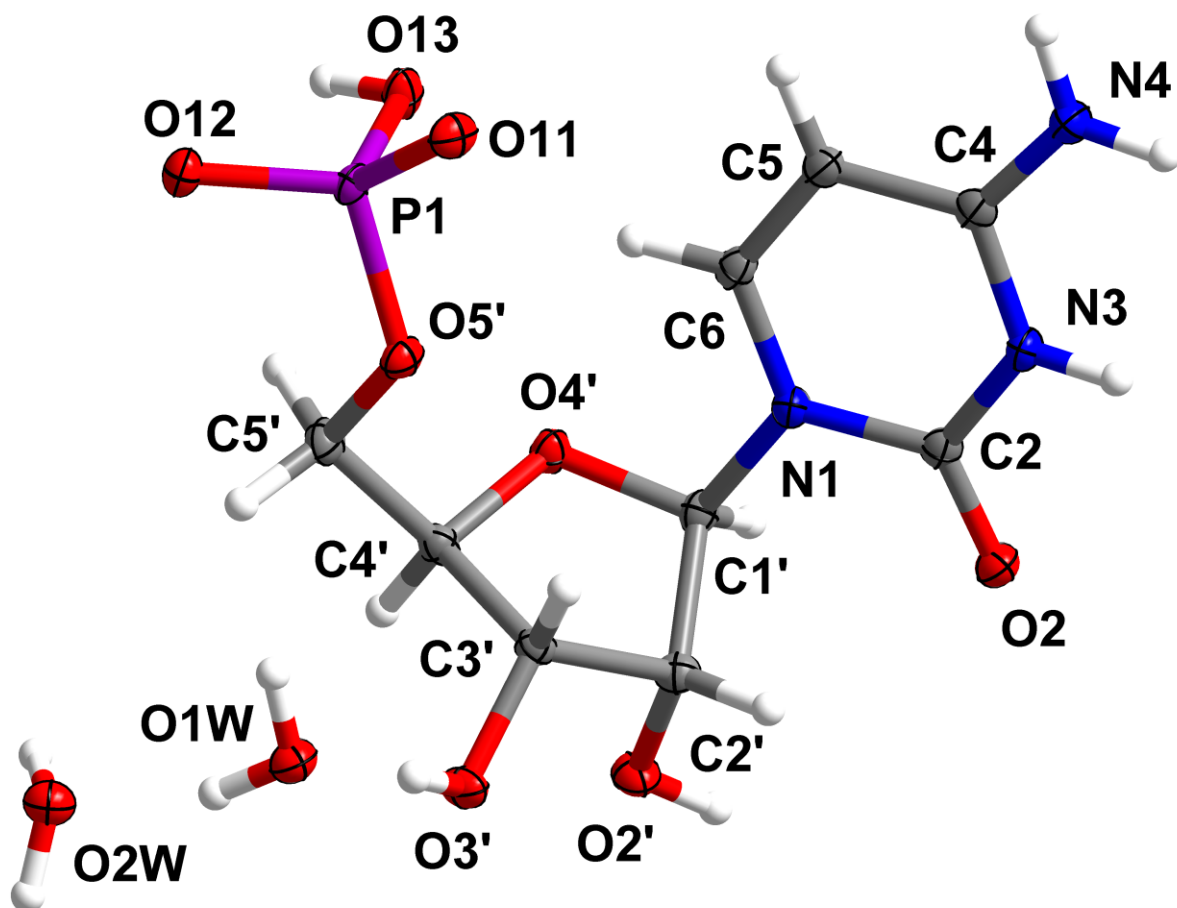

**Figure S2.** Asymmetric unit of triclinic crystal CMP·2H<sub>2</sub>O (I). Displacement ellipsoids are shown at the 50% probability level.

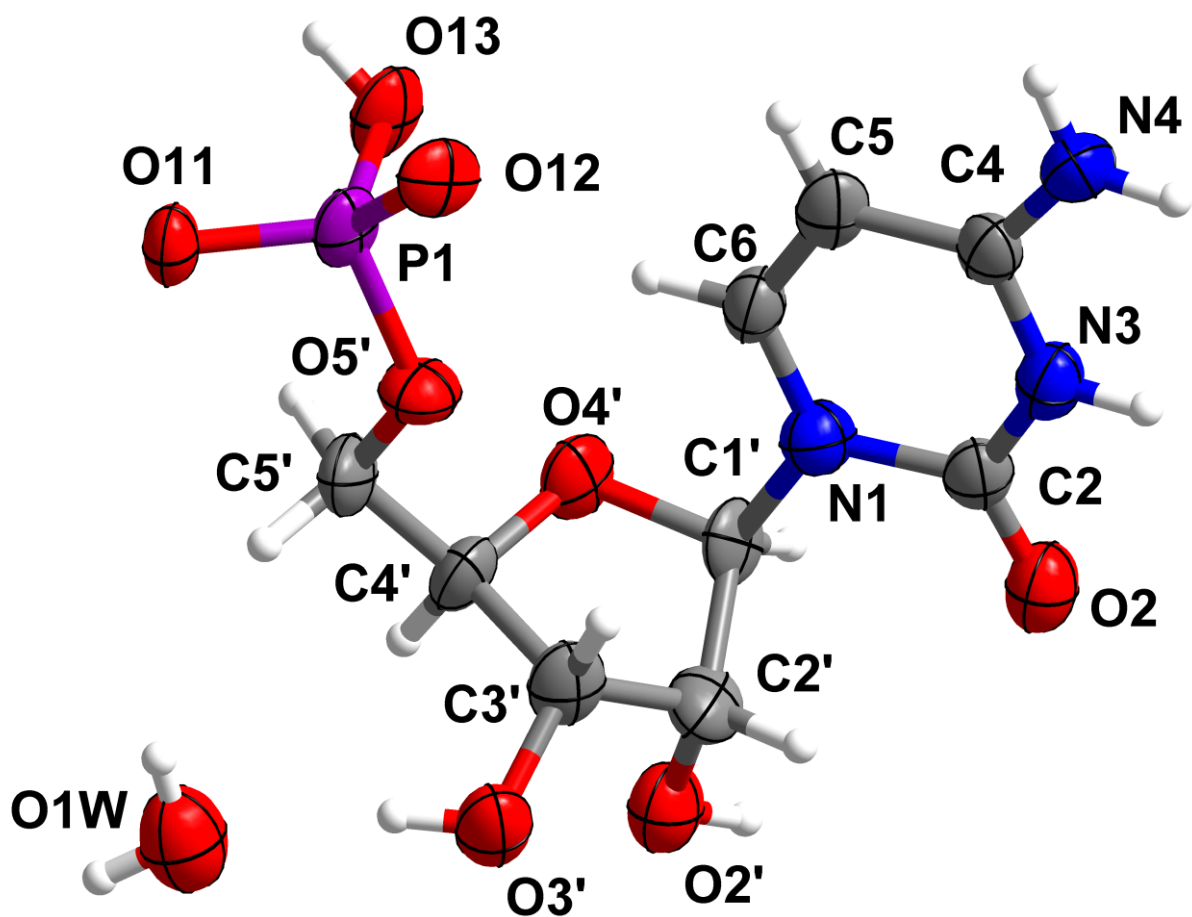

**Figure S3.** Asymmetric unit of triclinic crystal CMP·H<sub>2</sub>O (II). Displacement ellipsoids are shown at the 50% probability level.



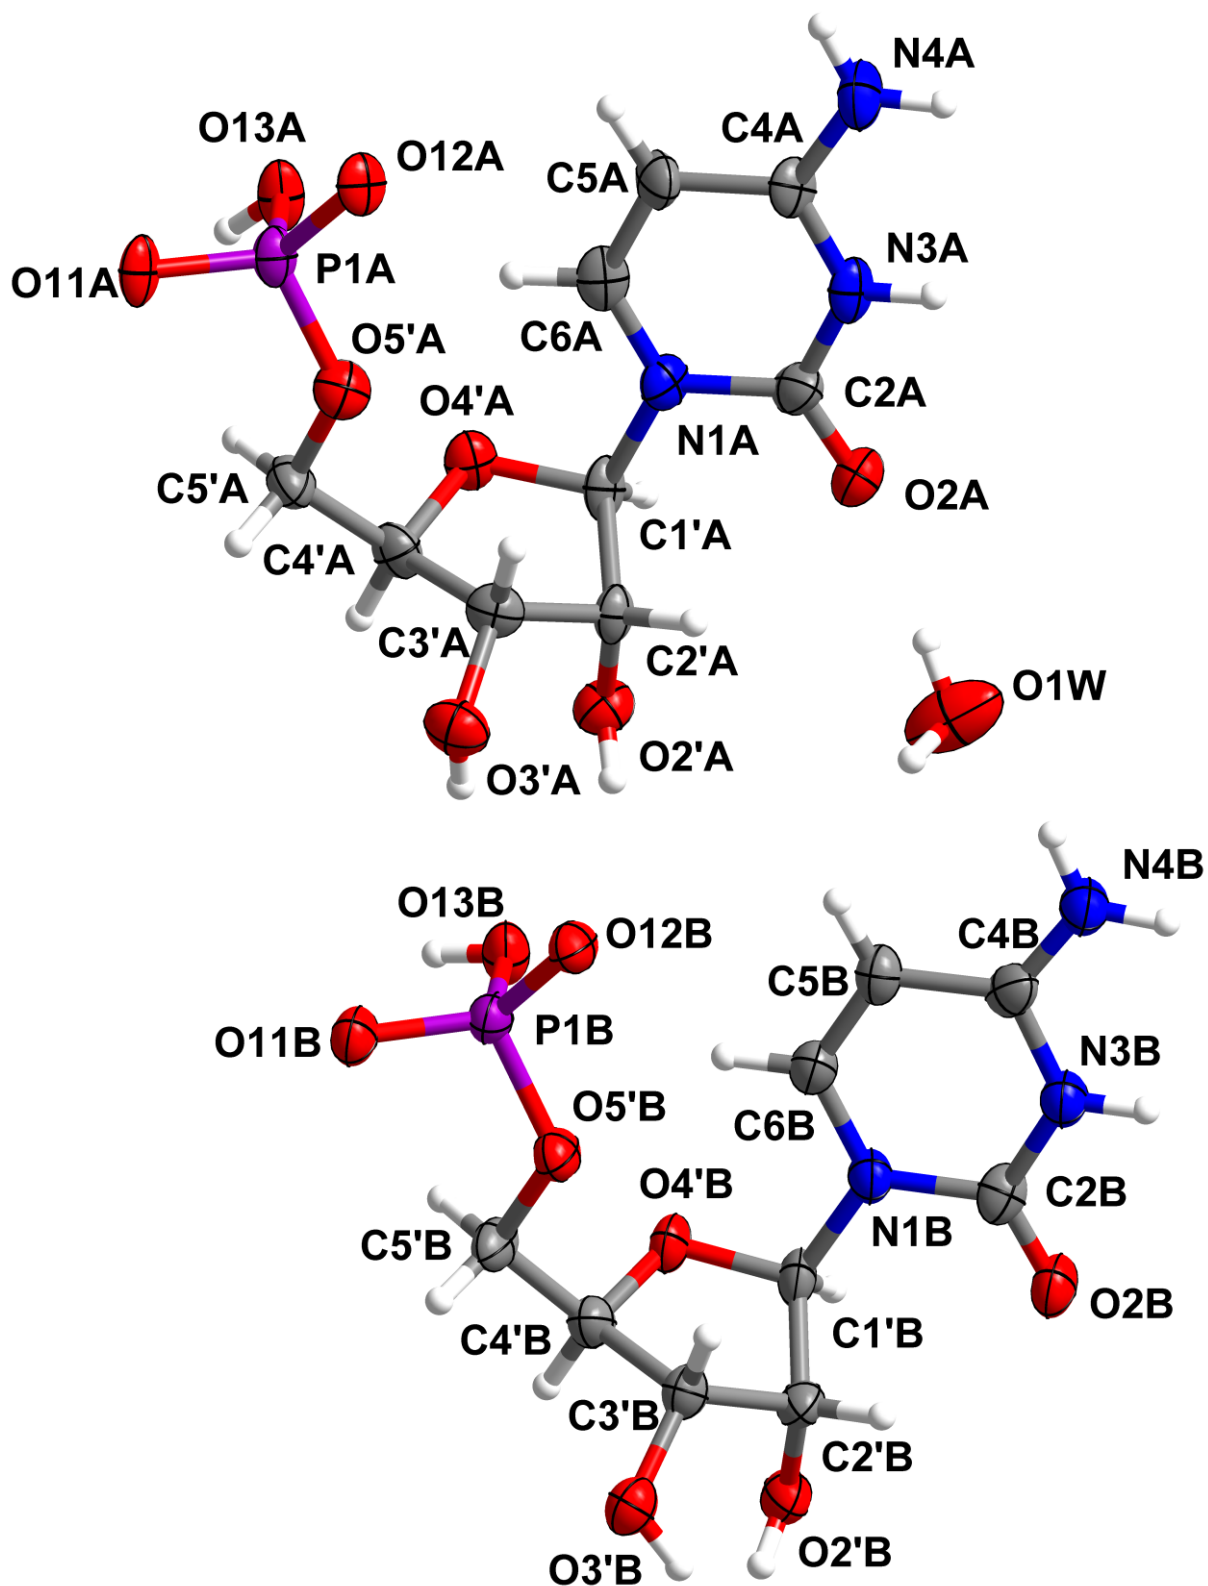

**Figure S4.** Asymmetric unit of triclinc crystal CMP·0.5H<sub>2</sub>O (III). Displacement ellipsoids are shown at the 50% probability level.

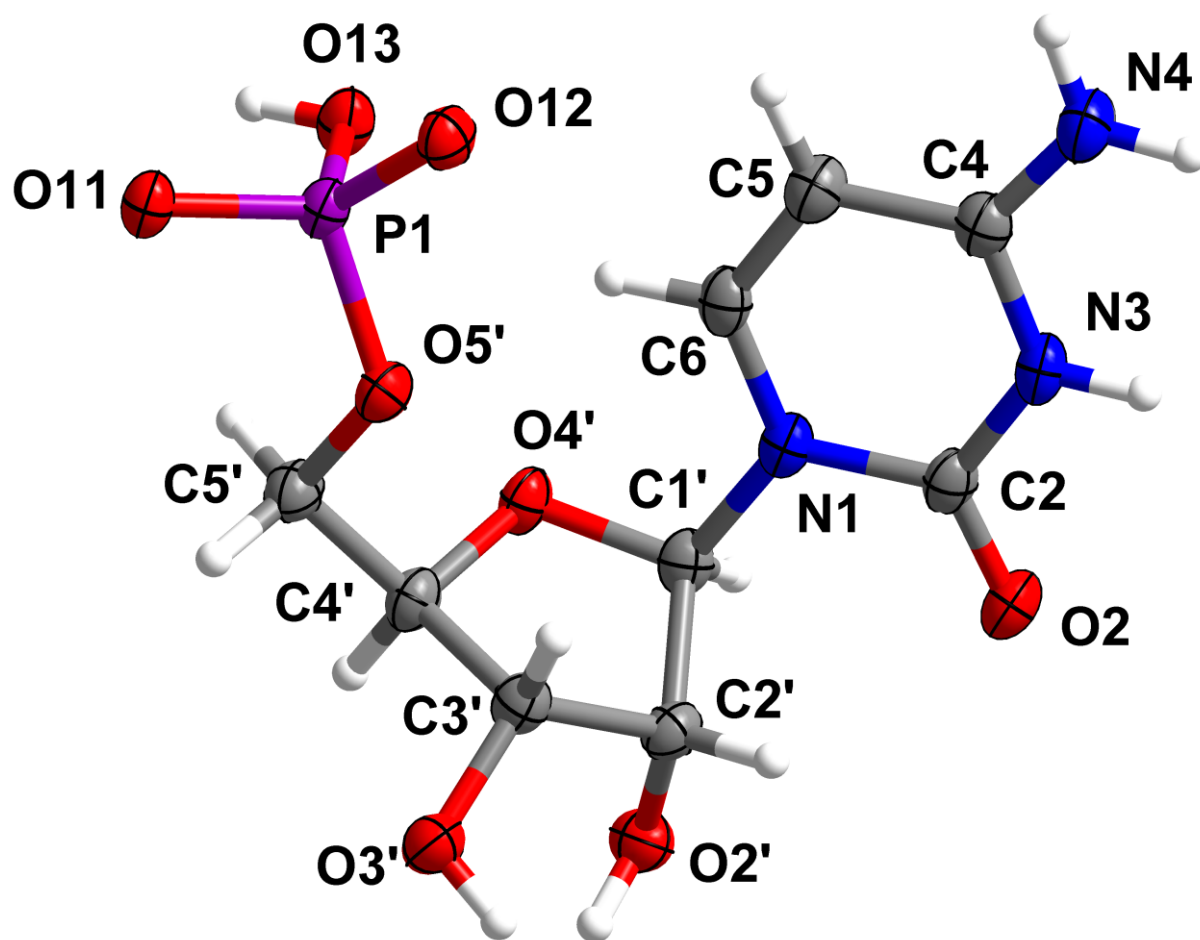

**Figure S5.** Asymmetric unit of triclinc crystal CMP (IV). Displacement ellipsoids are shown at the 50% probability level.

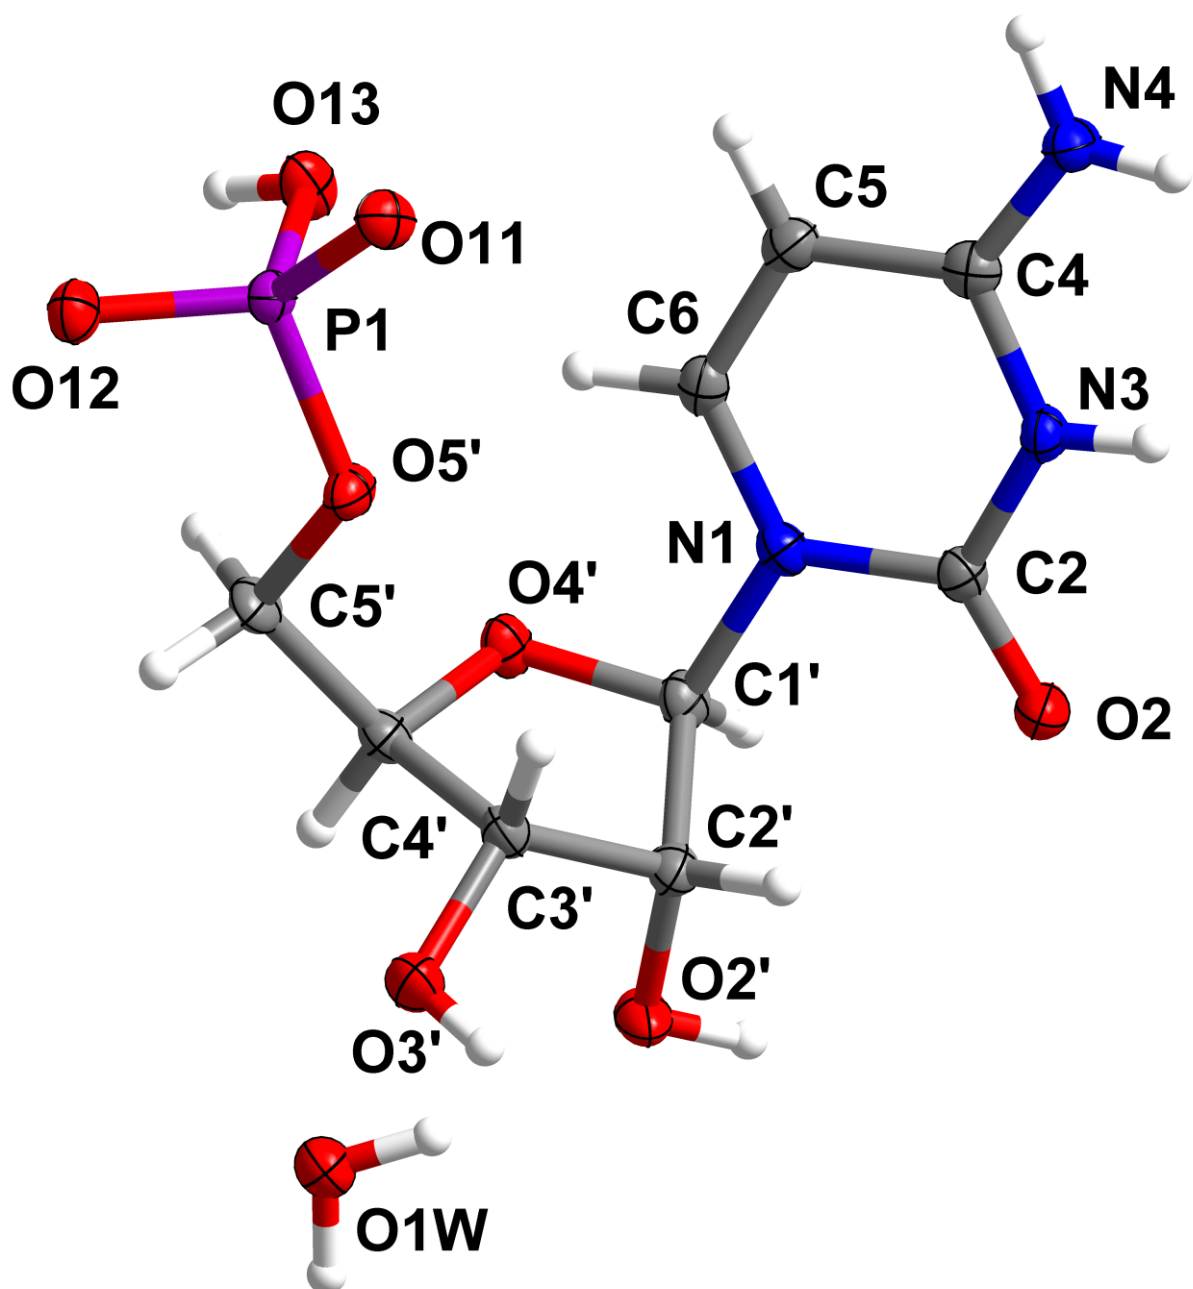

**Figure S6.** Asymmetric unit of monoclinic crystal CMP·H<sub>2</sub>O (WIWZOV) (V). Displacement ellipsoids are shown at the 50% probability level. Atom labelling scheme has been adapted to the remaining structures.

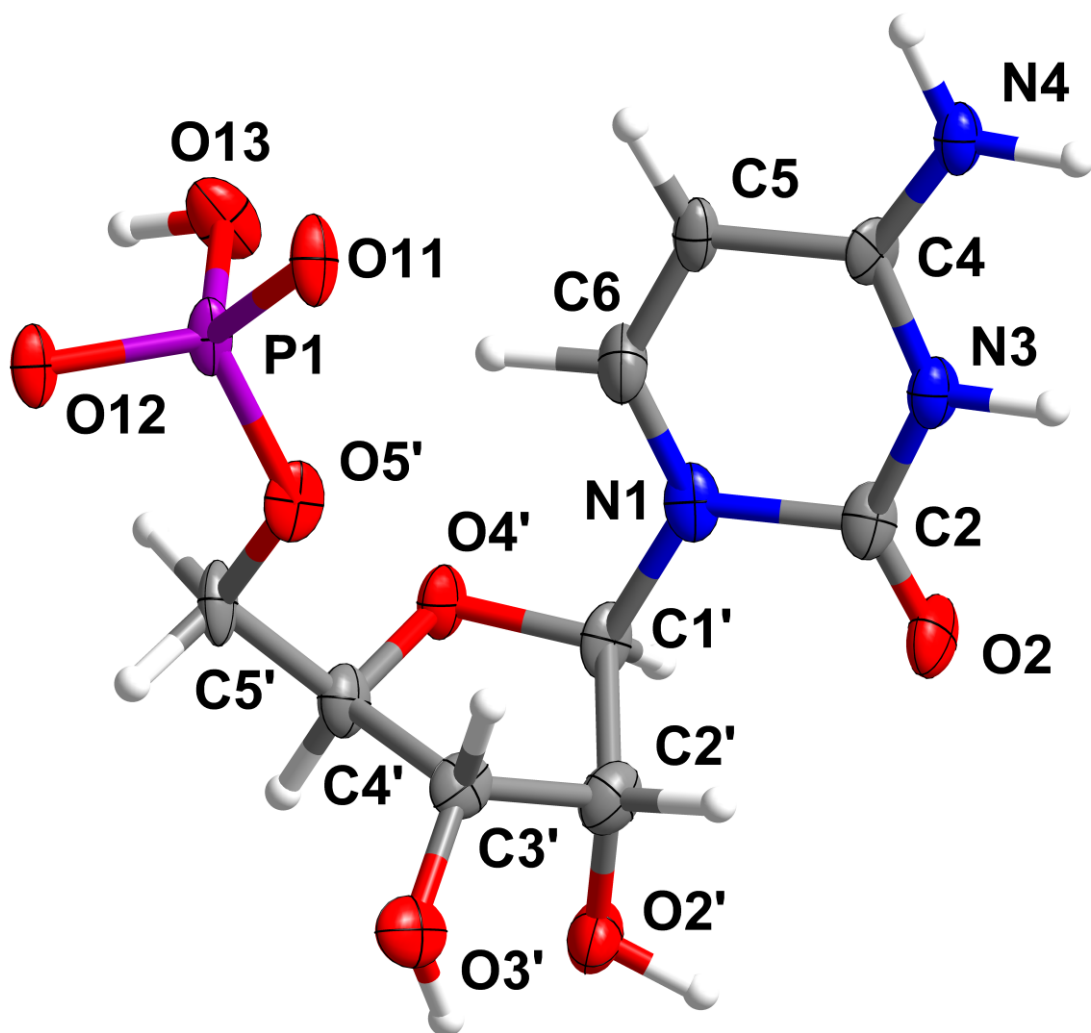

**Figure S7.** Asymmetric unit of monoclinic crystal CMP (VI). Displacement ellipsoids are shown at the 50% probability level.

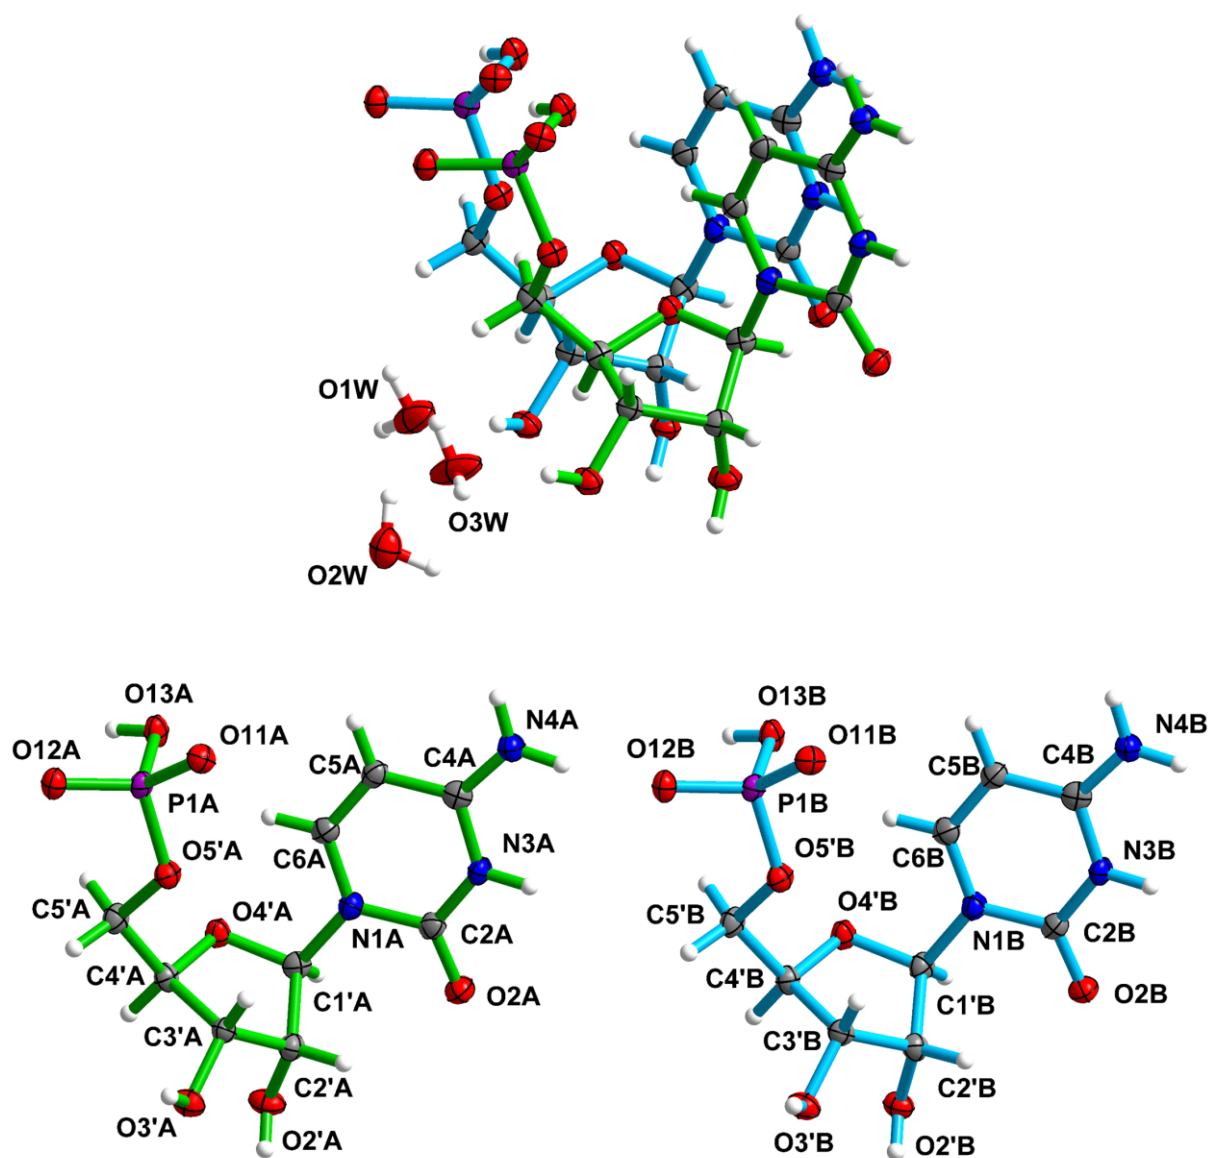

**Figure S8.** Asymmetric unit of low-temperature phase of orthorhombic crystal CMP·1.5H<sub>2</sub>O (VII\_LT) (top) and atom-numbering scheme of zwitterions A and B (bottom). Displacement ellipsoids are shown at the 50% probability level.

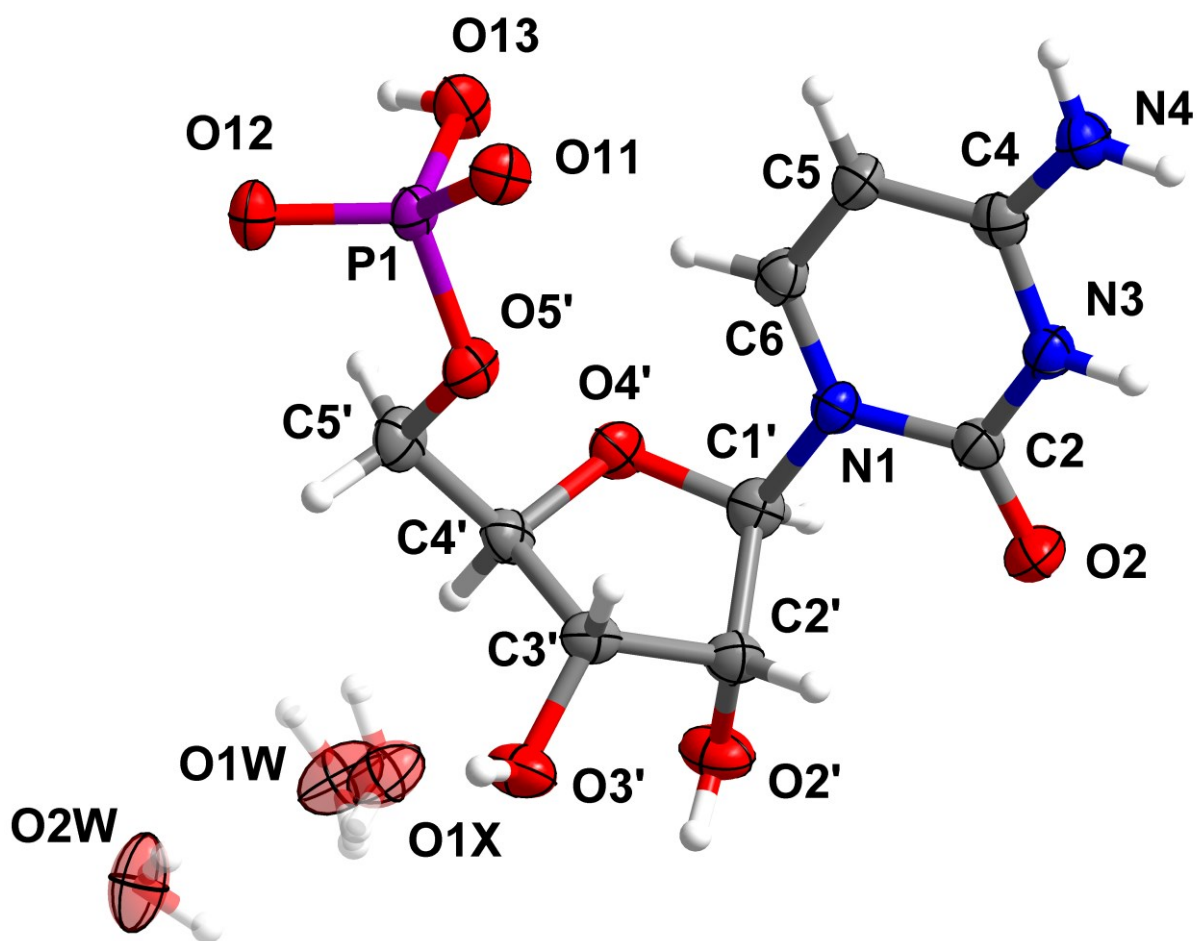

**Figure S9.** Asymmetric unit of high-temperature phase of orthorhombic crystal CMP·1.5H<sub>2</sub>O (VII\_HT). Displacement ellipsoids are shown at the 50% probability level. Transparent ellipsoids and bonds represent atoms with <1 site occupation factors values.

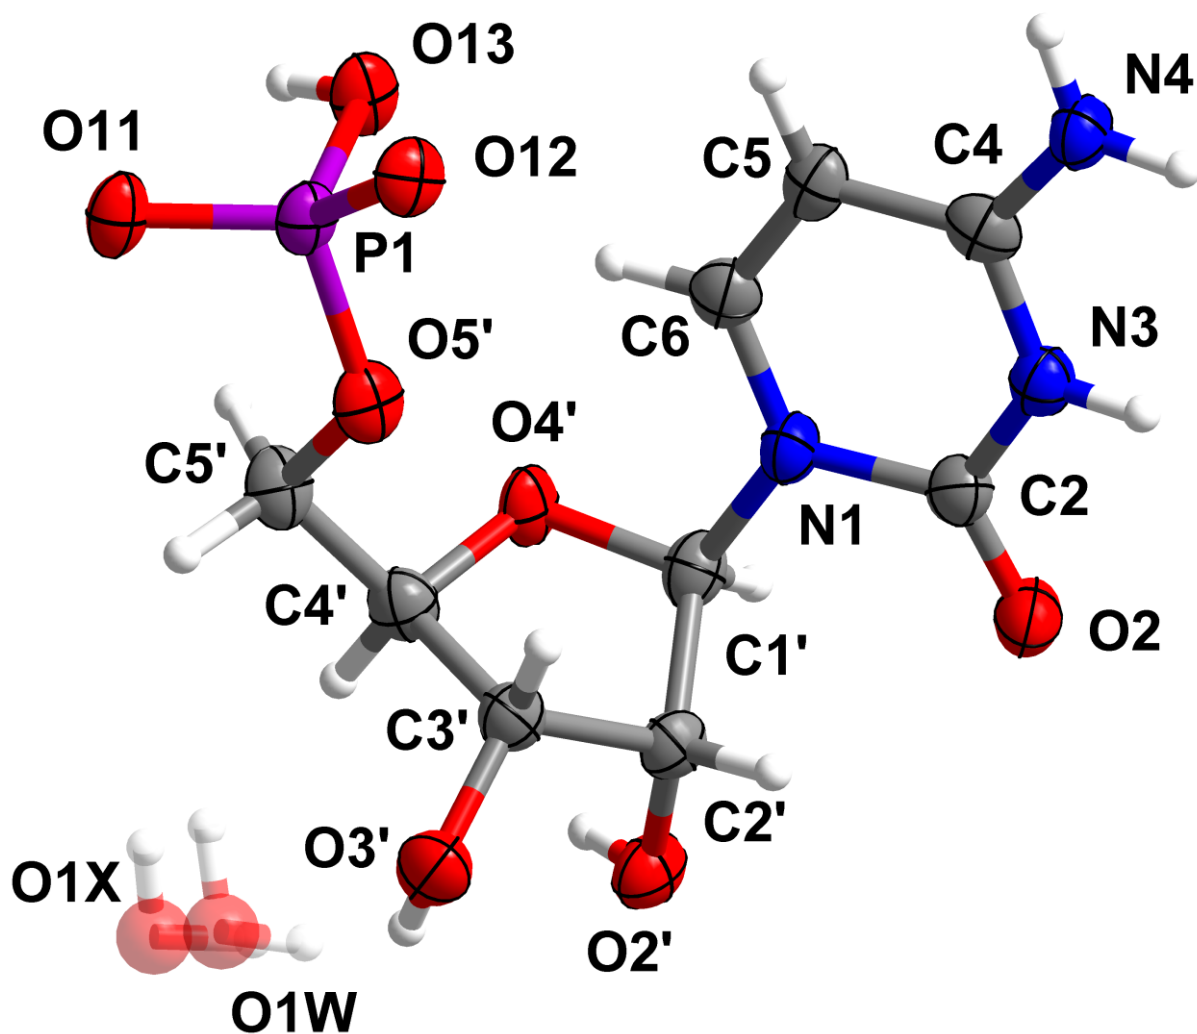

**Figure S10.** Asymmetric unit of orthorhombic crystal CMP·H<sub>2</sub>O (VIII). Displacement ellipsoids are shown at the 50% probability level. Transparent spheres and bonds represent atoms with <1 site occupation factors values.

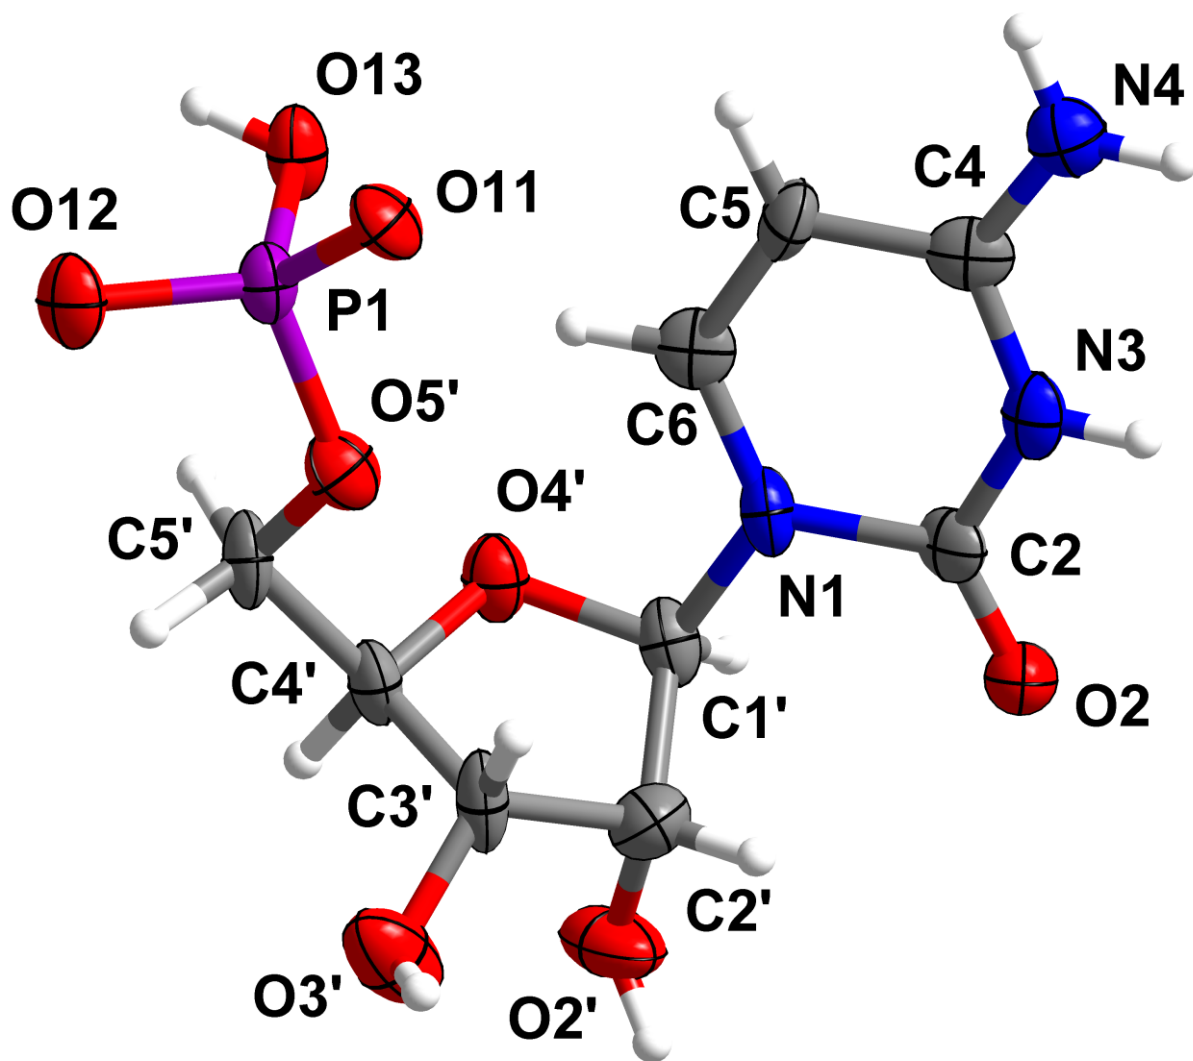

**Figure S11.** Asymmetric unit of orthorhombic crystal CMP (IX). Displacement ellipsoids are shown at the 50% probability level.



**Table S4.** P–O bonds lengths (Å) and selected valence angles and torsion angles values (°) for triclinic crystals CMP·2H<sub>2</sub>O (**I**), CMP·H<sub>2</sub>O (**II**), CMP·0.5H<sub>2</sub>O (**III**), CMP (**IV**), monoclinic crystals CMP·H<sub>2</sub>O (WIWZOV) (**V**), CMP (**VI**) and orthorhombic crystals CMP·1.5H<sub>2</sub>O (**VII\_LT**), CMP·1.5H<sub>2</sub>O (**VII\_HT**), CMP·H<sub>2</sub>O (**VIII**) and CMP (**IX**).

|                   | P1–O5'     | P1–O11     | P1–O12     | P1–O13     | O11–P1–O5' | O12–P1–O5' | O13–P1–O5' | C2–N1–C1'–O4' | P1–O5'–C5'–C4' | O5'–C5'–C4'–O4' | O5'–C5'–C4'–C3' |
|-------------------|------------|------------|------------|------------|------------|------------|------------|---------------|----------------|-----------------|-----------------|
| <b>I</b>          | 1.6002(19) | 1.4986(19) | 1.4996(19) | 1.5761(19) | 103.99(10) | 110.83(10) | 104.77(10) | –177.6(2)     | 143.28(18)     | –67.0(3)        | 51.1(3)         |
| <b>II</b>         | 1.596(11)  | 1.499(10)  | 1.505(10)  | 1.576(12)  | 109.9(6)   | 106.6(6)   | 102.6(6)   | –175.8(12)    | 151.5(12)      | –66.7(19)       | 52(2)           |
| <b>III</b> (A)    | 1.586(8)   | 1.494(7)   | 1.517(7)   | 1.564(7)   | 111.9(4)   | 104.5(4)   | 103.6(4)   | –173.2(8)     | 142.4(8)       | –63.6(11)       | 54.2(12)        |
| <b>III</b> (B)    | 1.614(8)   | 1.493(8)   | 1.509(7)   | 1.562(8)   | 109.4(4)   | 105.5(4)   | 103.9(4)   | –176.3(9)     | 145.2(8)       | –62.8(11)       | 56.1(12)        |
| <b>IV</b>         | 1.603(4)   | 1.502(3)   | 1.502(4)   | 1.585(4)   | 110.9(2)   | 104.9(2)   | 104.27(19) | –175.2(4)     | 143.5(3)       | –63.7(5)        | 55.0(6)         |
| <b>V</b>          | 1.599(2)   | 1.493(2)   | 1.494(2)   | 1.581(2)   | 106.21(12) | 109.23(13) | 105.08(13) | –177.4(2)     | 154.6(2)       | –71.2(3)        | 47.8(4)         |
| <b>VI</b>         | 1.584(17)  | 1.503(19)  | 1.517(15)  | 1.592(14)  | 107.6(9)   | 110.5(10)  | 106.2(9)   | –174.0(12)    | 153.4(11)      | –70.5(17)       | 50(2)           |
| <b>VII_LT</b> (A) | 1.598(3)   | 1.493(3)   | 1.495(3)   | 1.577(3)   | 105.88(15) | 110.26(15) | 105.00(15) | –178.7(3)     | 151.5(2)       | –69.9(4)        | 49.3(4)         |
| <b>VII_LT</b> (B) | 1.595(3)   | 1.492(3)   | 1.498(3)   | 1.576(3)   | 106.00(15) | 109.81(15) | 105.11(15) | –177.2(3)     | 149.8(2)       | –69.0(4)        | 50.1(4)         |
| <b>VII_HT</b>     | 1.598(3)   | 1.488(3)   | 1.495(3)   | 1.575(3)   | 105.82(16) | 109.98(17) | 104.85(17) | –176.9(3)     | 151.6(3)       | –68.8(4)        | 50.1(5)         |
| <b>VIII</b>       | 1.592(6)   | 1.487(5)   | 1.492(5)   | 1.570(5)   | 110.6(3)   | 105.6(3)   | 105.0(3)   | –178.5(6)     | 151.5(5)       | –71.0(7)        | 46.9(8)         |
| <b>IX</b>         | 1.605(10)  | 1.481(9)   | 1.521(10)  | 1.583(10)  | 107.1(5)   | 109.4(5)   | 104.6(5)   | –174.2(10)    | 156.1(9)       | –72.5(14)       | 50.8(15)        |

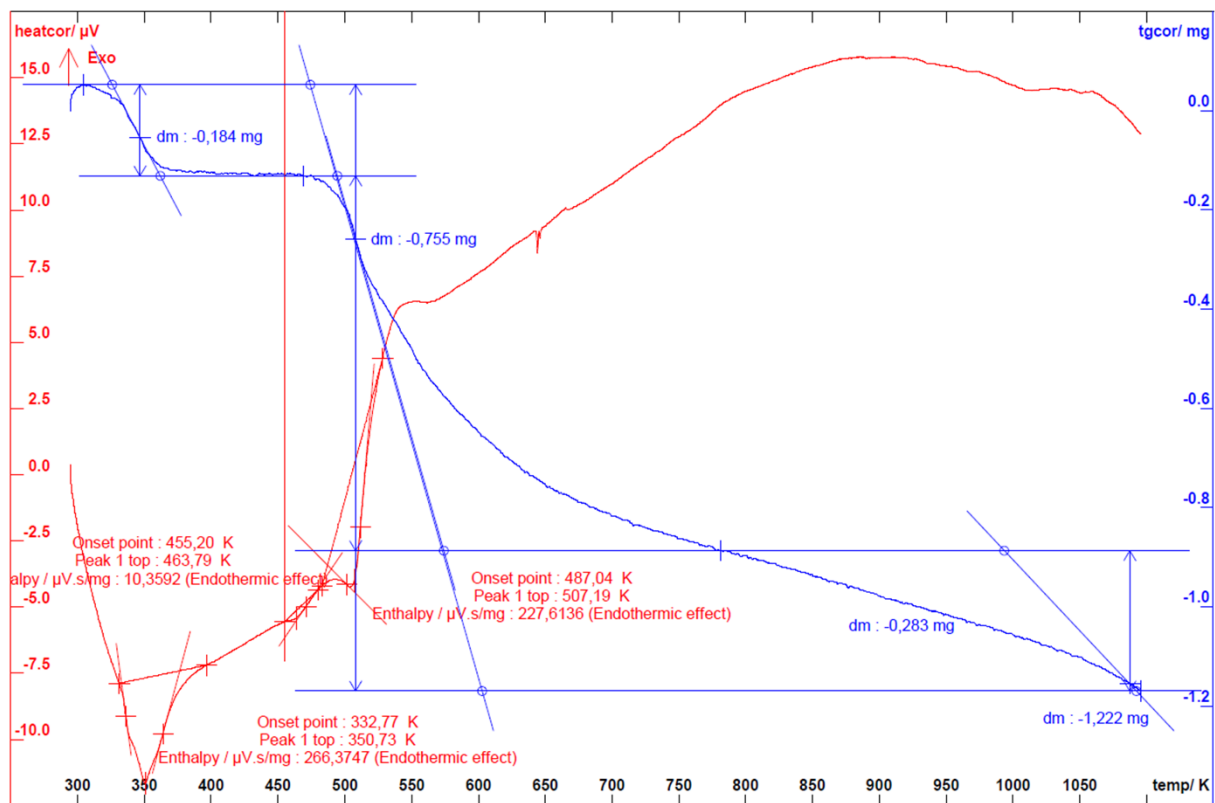

**Figure S12.** TGA (blue) and DTA (red) curves of triclinic crystals  $\text{CMP}\cdot 2\text{H}_2\text{O}$  (mass of sample = 1.950 mg).

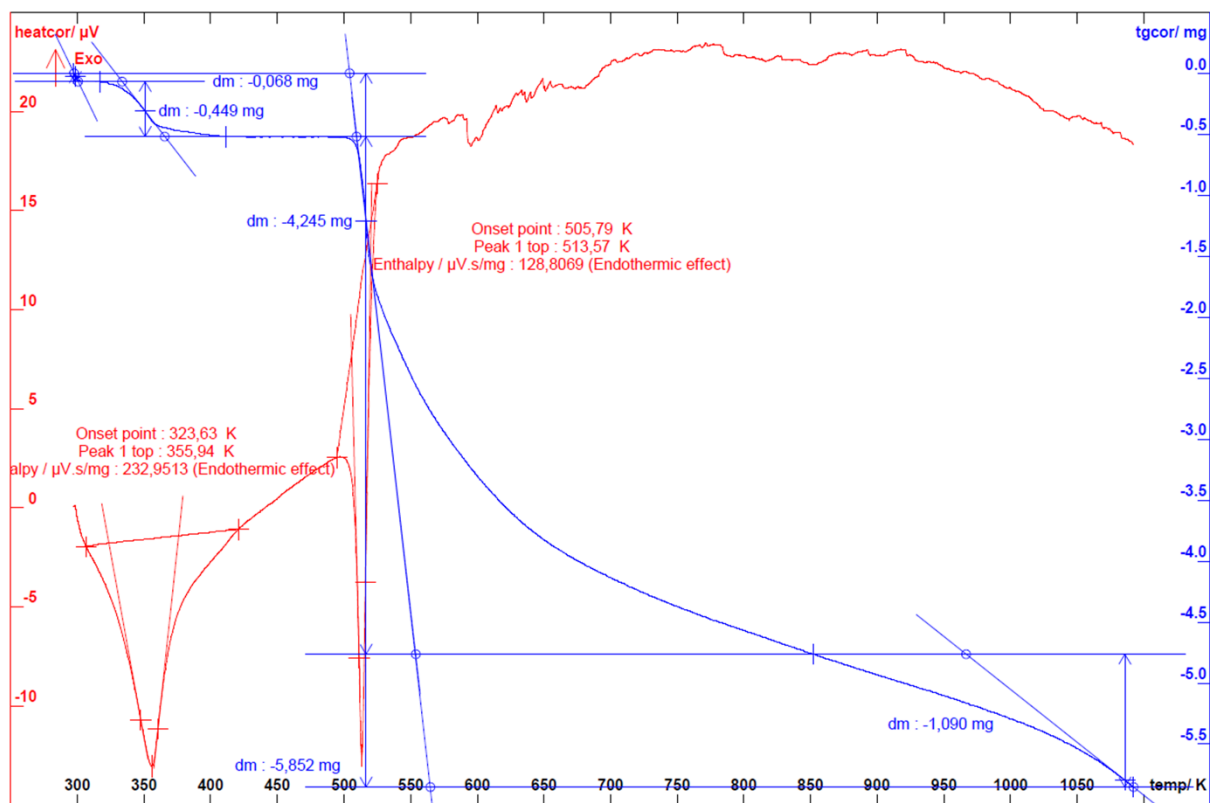

**Figure S13.** TGA (blue) and DTA (red) curves of monoclinic crystals  $\text{CMP}\cdot\text{H}_2\text{O}$  (mass of sample = 9.584 mg).

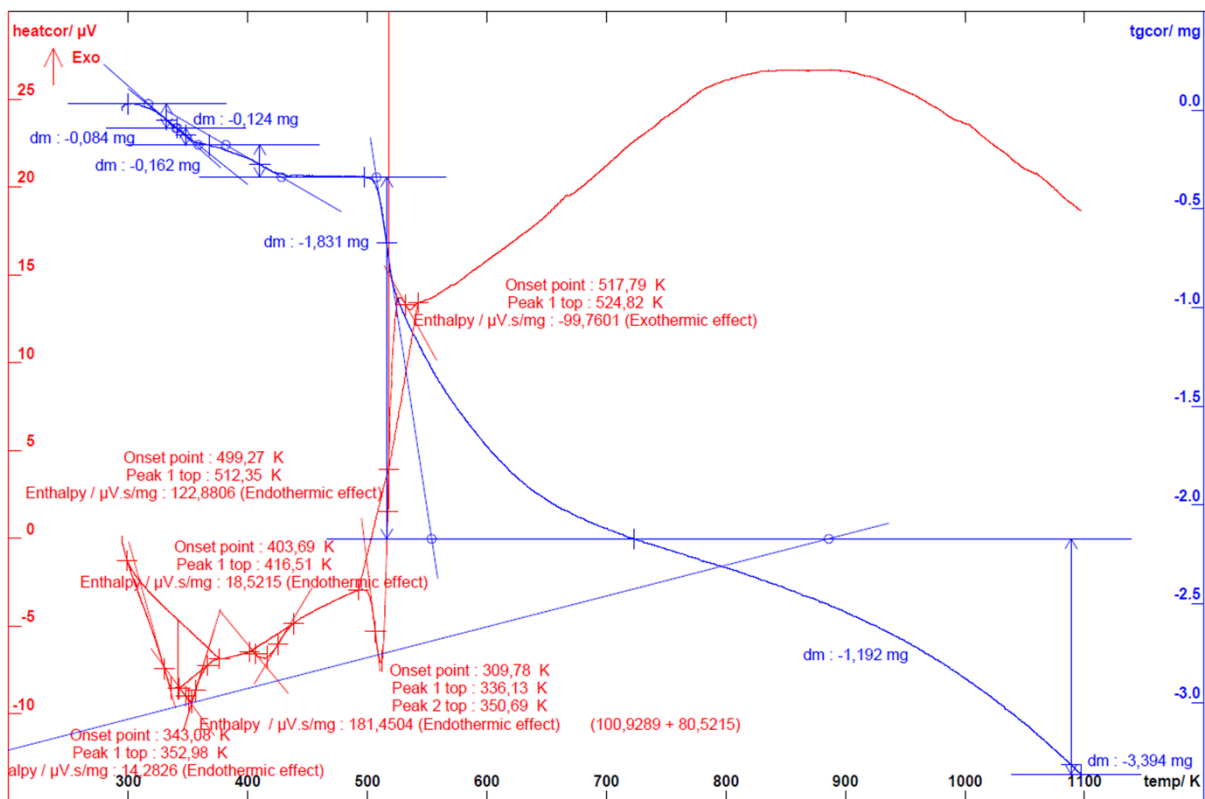

**Figure S14.** TGA (blue) and DTA (red) curves of orthorhombic crystals CMP·1.5H<sub>2</sub>O (mass of sample = 4.722 mg).

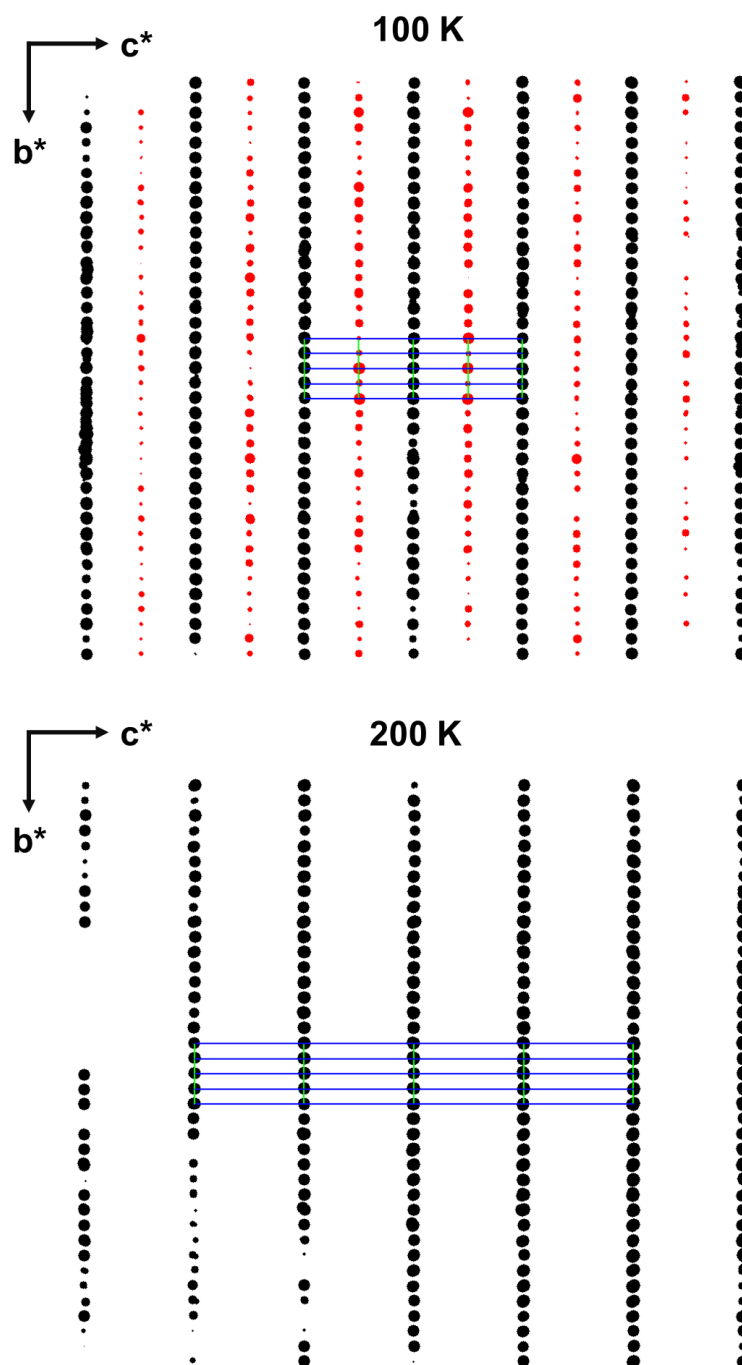

**Figure S15.** Diffraction pattern of low- (top) and high-temperature (bottom) phases of orthorhombic CMP·1.5H<sub>2</sub>O crystal. Visible superstructure weak reflections (red) in the direction of the  $c^*$  axis in LT phase.

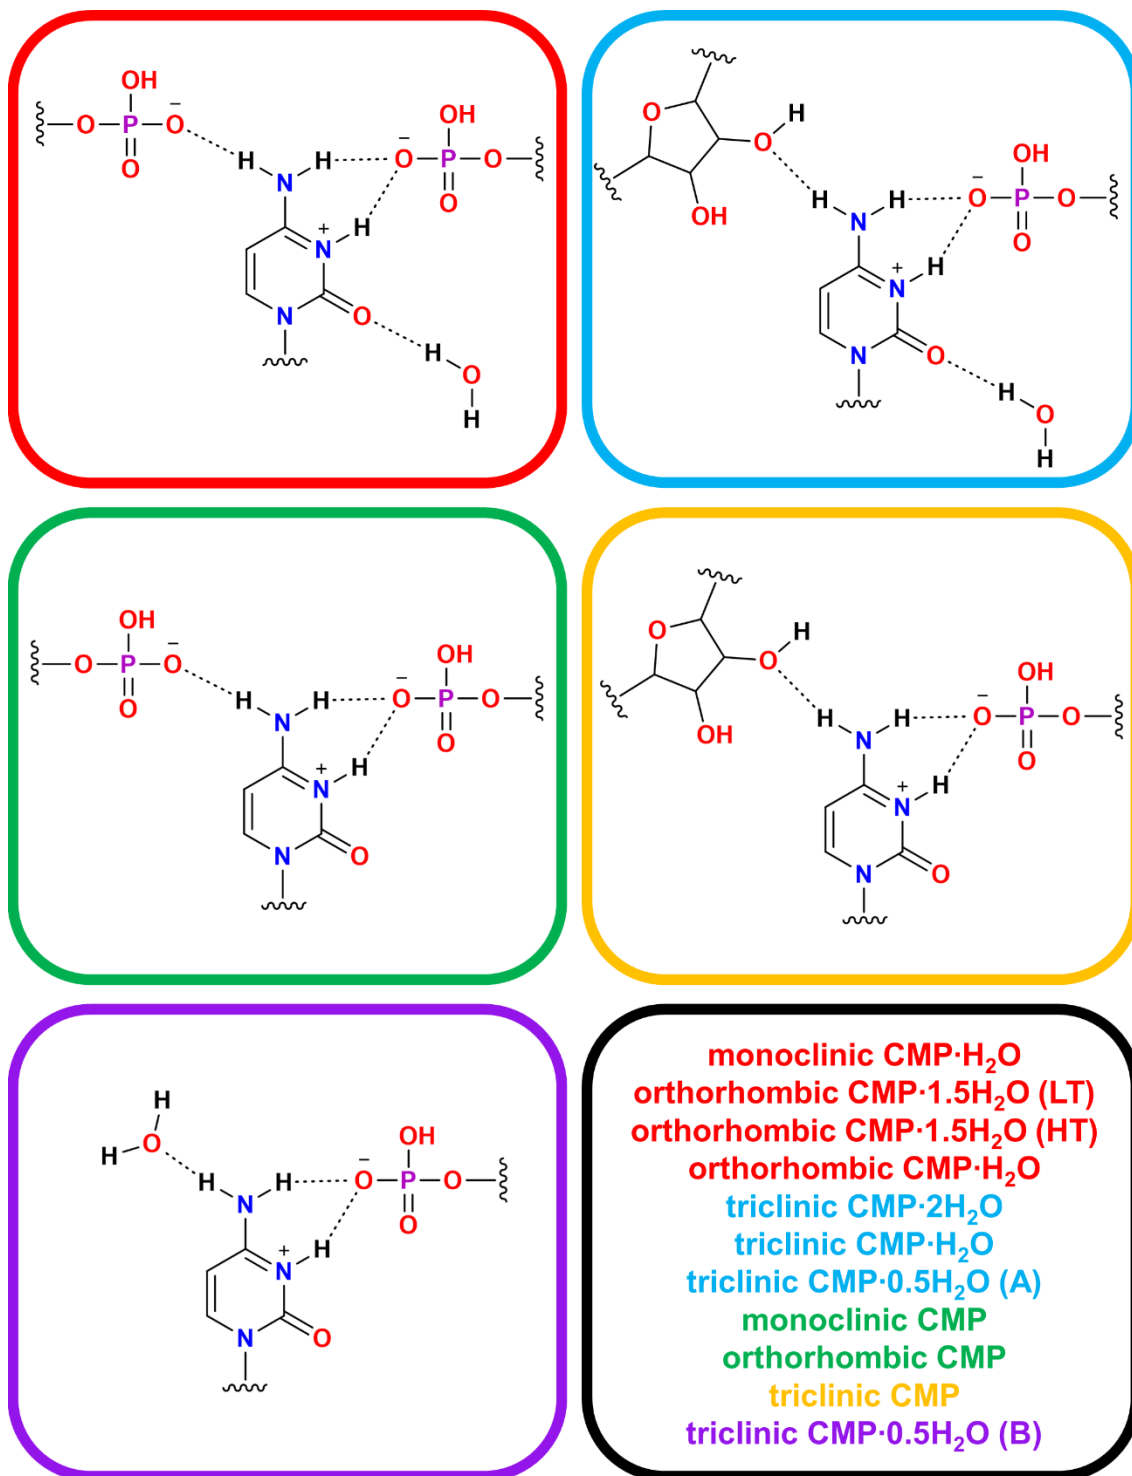

**Figure S16.** Supramolecular motifs formed by cytosine in individual crystals. Individual motifs and crystals in which they appear are marked with the same colour.

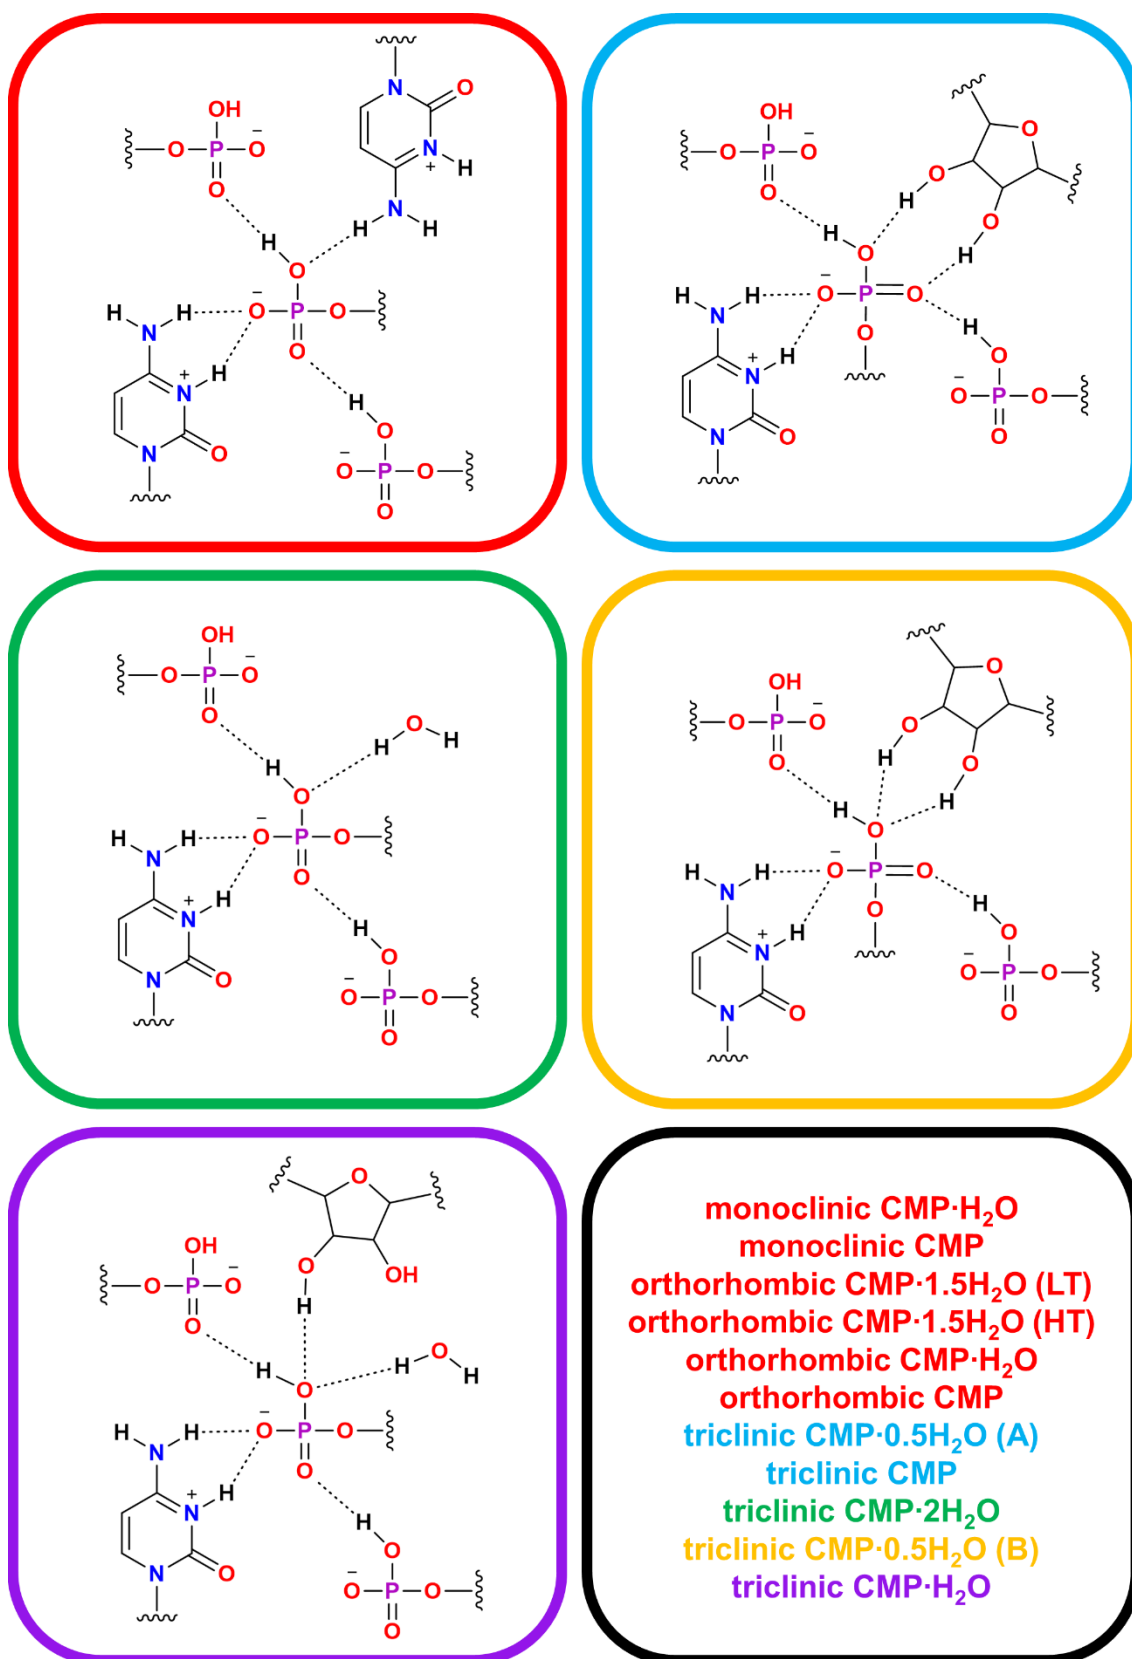

**Figure S17.** Supramolecular motifs formed by phosphate in individual crystals. Individual motifs and crystals in which they appear are marked with the same colour.

**Table S5.** Geometric parameters (Å, °) of the hydrogen bonds for triclinic crystal CMP·2H<sub>2</sub>O (I).

| D–H···A                     | D–H  | H···A | D···A    | D–H···A |
|-----------------------------|------|-------|----------|---------|
| O13–H13···O11 <sup>i</sup>  | 0.84 | 1.78  | 2.601(3) | 166     |
| O2'–H2O···O2W <sup>ii</sup> | 0.84 | 1.89  | 2.730(3) | 178     |
| O3'–H3O···O1W               | 0.84 | 1.83  | 2.670(3) | 176     |
| O1W–H1W···O2 <sup>iii</sup> | 0.84 | 1.94  | 2.719(3) | 154     |
| O1W–H2W···O2W <sup>iv</sup> | 0.84 | 2.00  | 2.795(3) | 159     |
| O2W–H3W···O11               | 0.84 | 1.80  | 2.634(3) | 176     |
| O2W–H4W···O1W <sup>v</sup>  | 0.84 | 1.88  | 2.720(3) | 173     |
| N3–H3···O12 <sup>vi</sup>   | 0.88 | 1.78  | 2.626(3) | 160     |
| N4–H41···O12 <sup>vi</sup>  | 0.88 | 2.25  | 2.965(3) | 138     |
| N4–H42···O3' <sup>vii</sup> | 0.88 | 2.01  | 2.878(3) | 169     |
| C6–H6···O13                 | 0.95 | 2.40  | 3.285(3) | 154     |
| C6–H6···O5'                 | 0.95 | 2.59  | 3.195(3) | 122     |

Symmetry codes: (i)  $x-1, y, z$ ; (ii)  $x, y+1, z-1$ ; (iii)  $x, y-1, z$ ; (iv)  $x, y, z-1$ ; (v)  $x-1, y, z+1$ ; (vi)  $x+1, y+1, z$ ; (vii)  $x, y, z+1$ .

**Table S6.** Geometric parameters (Å, °) of the hydrogen bonds for triclinic crystal CMP·H<sub>2</sub>O (II).

| D–H···A                       | D–H  | H···A | D···A     | D–H···A |
|-------------------------------|------|-------|-----------|---------|
| O13–H13···O12 <sup>i</sup>    | 0.84 | 2.01  | 2.681(13) | 136     |
| O2'–H2O···O12 <sup>ii</sup>   | 0.84 | 2.30  | 2.914(17) | 130     |
| O3'–H3O···O1W                 | 0.84 | 1.79  | 2.619(17) | 167     |
| O1W–H1W···O2 <sup>iii</sup>   | 0.84 | 2.06  | 2.78(2)   | 144     |
| O1W–H2W···O12 <sup>iv</sup>   | 0.84 | 2.25  | 2.823(18) | 126     |
| N3–H3···O11 <sup>v</sup>      | 0.88 | 1.89  | 2.703(16) | 154     |
| N4–H41···O11 <sup>v</sup>     | 0.88 | 2.08  | 2.834(15) | 143     |
| N4–H41···O2' <sup>vi</sup>    | 0.88 | 2.61  | 3.238(17) | 129     |
| N4–H42···O3' <sup>vii</sup>   | 0.88 | 1.95  | 2.790(17) | 158     |
| C6–H6···O5'                   | 0.95 | 2.45  | 3.055(16) | 122     |
| C3'–H3'···O4' <sup>viii</sup> | 1.00 | 2.62  | 3.289(19) | 124     |
| C4'–H4'···O3' <sup>ix</sup>   | 1.00 | 2.46  | 3.29(2)   | 140     |
| C5'–H5'1···O1W                | 0.99 | 2.58  | 3.41(2)   | 141     |

Symmetry codes: (i)  $x-1, y, z$ ; (ii)  $x, y+1, z-1$ ; (iii)  $x, y-1, z$ ; (iv)  $x, y, z-1$ ; (v)  $x+1, y+1, z$ ; (vi)  $x+1, y, z+1$ ; (vii)  $x, y, z+1$ ; (viii)  $x+1, y, z$ .



**Table S7.** Geometric parameters (Å, °) of the hydrogen bonds for triclinic crystal CMP·0.5H<sub>2</sub>O (III).

| D–H···A                        | D–H  | H···A | D···A     | D–H···A |
|--------------------------------|------|-------|-----------|---------|
| O13A–H13A···O12A <sup>i</sup>  | 0.84 | 2.03  | 2.580(9)  | 122     |
| O2'A–H2OA···O12B               | 0.84 | 1.92  | 2.724(11) | 161     |
| O3'A–H3OA···O12B               | 0.84 | 2.29  | 3.042(11) | 149     |
| O13B–H13B···O12B <sup>i</sup>  | 0.84 | 1.86  | 2.668(11) | 160     |
| O2'B–H2OB···O13A <sup>ii</sup> | 0.84 | 1.95  | 2.749(11) | 158     |
| O3'B–H3OB···O12A <sup>ii</sup> | 0.84 | 2.01  | 2.761(10) | 149     |
| O3'B–H3OB···O13A <sup>ii</sup> | 0.84 | 2.54  | 3.209(12) | 137     |
| O1W–H1W···O2'A <sup>iii</sup>  | 0.84 | 2.13  | 2.803(12) | 137     |
| O1W–H2W···O2A                  | 0.84 | 1.93  | 2.751(13) | 166     |
| N3A–H3A···O11A <sup>iv</sup>   | 0.88 | 1.74  | 2.605(10) | 166     |
| N3B–H3B···O11B <sup>iv</sup>   | 0.88 | 1.88  | 2.681(11) | 150     |
| N4A–H41A···O11A <sup>iv</sup>  | 0.88 | 2.45  | 3.108(12) | 132     |
| N4A–H42A···O2'B <sup>v</sup>   | 0.88 | 2.42  | 3.049(12) | 129     |
| N4B–H41B···O11B <sup>iv</sup>  | 0.88 | 1.97  | 2.733(12) | 145     |
| N4B–H42B···O1W                 | 0.88 | 1.88  | 2.728(14) | 162     |
| C6A–H6A···O13A                 | 0.95 | 2.59  | 3.506(13) | 162     |
| C6A–H6A···O5'A                 | 0.95 | 2.49  | 3.182(12) | 130     |
| C6B–H6B···O13B                 | 0.95 | 2.56  | 3.457(14) | 158     |
| C6B–H6B···O5'B                 | 0.95 | 2.47  | 3.102(13) | 124     |

Symmetry codes: (i)  $x+1, y, z$ ; (ii)  $x, y+1, z+1$ ; (iii)  $x-1, y, z$ ; (iv)  $x-1, y+1, z$ ; (v)  $x-1, y-1, z-1$ .

**Table S8.** Geometric parameters (Å, °) of the hydrogen bonds for triclinic crystal CMP (IV).

| D–H···A                     | D–H  | H···A | D···A    | D–H···A |
|-----------------------------|------|-------|----------|---------|
| O13–H13···O12 <sup>i</sup>  | 0.84 | 1.79  | 2.588(5) | 157     |
| O2'–H2O···O13 <sup>ii</sup> | 0.84 | 1.96  | 2.764(5) | 159     |
| O3'–H3O···O12 <sup>ii</sup> | 0.84 | 1.96  | 2.763(5) | 159     |
| N3–H3···O11 <sup>iii</sup>  | 0.88 | 1.76  | 2.595(6) | 158     |
| N4–H41···O11 <sup>iii</sup> | 0.88 | 2.22  | 2.924(6) | 137     |
| N4–H42···O2' <sup>iv</sup>  | 0.88 | 2.37  | 3.027(6) | 131     |
| C6–H6···O13                 | 0.95 | 2.54  | 3.435(7) | 158     |
| C6–H6···O5'                 | 0.95 | 2.45  | 3.100(6) | 126     |

Symmetry codes: (i)  $x+1, y, z$ ; (ii)  $x, y, z-1$ ; (iii)  $x-1, y-1, z$ ; (iv)  $x-1, y, z+1$ .

**Table S9.** Geometric parameters (Å, °) of the hydrogen bonds for monoclinic crystal CMP·H<sub>2</sub>O (WIWZOV) (V).

| D–H···A                      | D–H     | H···A   | D···A    | D–H···A |
|------------------------------|---------|---------|----------|---------|
| O13–H13···O11 <sup>i</sup>   | 0.84(5) | 1.76(5) | 2.588(3) | 171(4)  |
| O2'–H2O···O1W <sup>ii</sup>  | 0.86(6) | 1.95(6) | 2.768(4) | 158(4)  |
| O3'–H3O···O1W <sup>iii</sup> | 0.77(5) | 2.02(5) | 2.780(4) | 174(5)  |
| O1W–H1W···O2 <sup>iv</sup>   | 0.90(5) | 2.09(5) | 2.888(3) | 148(4)  |
| O1W–H2W···O2'                | 0.86(5) | 1.90(5) | 2.743(4) | 167(4)  |
| N3–H3···O12 <sup>v</sup>     | 0.84(4) | 1.84(4) | 2.637(3) | 158(4)  |
| N4–H42···O11 <sup>vi</sup>   | 0.91(4) | 1.89(5) | 2.787(4) | 169(4)  |
| N4–H41···O12 <sup>v</sup>    | 0.82(4) | 2.10(5) | 2.820(4) | 146(4)  |
| C6–H6···O13                  | 0.95    | 2.54    | 3.330(4) | 140     |

Symmetry codes: (i)  $x-1, y, z$ ; (ii)  $-x+1, y-1/2, -z+1$ ; (iii)  $x+1, y, z$ ; (iv)  $-x+1, y+1/2, -z+1$ ; (v)  $x+1, y-1, z$ ; (vi)  $-x+2, y-1/2, -z$ .

**Table S10.** Geometric parameters (Å, °) of the hydrogen bonds for monoclinic crystal CMP (VI).

| D–H···A                     | D–H  | H···A | D···A     | D–H···A |
|-----------------------------|------|-------|-----------|---------|
| O13–H13···O11 <sup>i</sup>  | 0.98 | 1.63  | 2.59(2)   | 163     |
| O2'–H2O···O3 <sup>ii</sup>  | 0.98 | 1.74  | 2.67(2)   | 155     |
| O3'–H3O···O2 <sup>iii</sup> | 0.98 | 2.37  | 3.16(2)   | 136     |
| N3–H3···O12 <sup>iv</sup>   | 1.03 | 1.73  | 2.69(2)   | 152     |
| N4–H42···O11 <sup>v</sup>   | 1.01 | 1.74  | 2.75(2)   | 176     |
| N4–H41···O12 <sup>iv</sup>  | 1.01 | 1.97  | 2.798(19) | 137     |
| C6–H6···O13                 | 1.08 | 2.62  | 3.55(2)   | 144     |

Symmetry codes: (i)  $x\phi 1, y, z$ ; (ii)  $\phi x+2, y\phi 1/2, \phi z+1$ ; (iii)  $\phi x+2, y+1/2, \phi z+1$ ; (iv)  $x+1, y\phi 1, z$ ; (v)  $\phi x+2, y\phi 1/2, \phi z$ .

**Table S11.** Geometric parameters (Å, °) of the hydrogen bonds for low-temperature phase of orthorhombic crystal CMP·1.5H<sub>2</sub>O (**VII\_LT**).

| D–H···A                         | D–H  | H···A | D···A    | D–H···A |
|---------------------------------|------|-------|----------|---------|
| O13A–H13A···O11B                | 0.84 | 1.78  | 2.598(4) | 164     |
| O2'A–H20A···O3'B <sup>i</sup>   | 0.84 | 1.93  | 2.763(4) | 175     |
| O3'A–H30A···O3W                 | 0.84 | 1.81  | 2.640(5) | 170     |
| O13B–H13B···O11A <sup>ii</sup>  | 0.84 | 1.77  | 2.592(4) | 167     |
| O2'B–H20B···O3'A <sup>iii</sup> | 0.84 | 1.87  | 2.699(4) | 171     |
| O3'B–H30B···O1W                 | 0.84 | 1.81  | 2.631(5) | 164     |
| O1W–H1W···O2B <sup>iv</sup>     | 0.87 | 1.98  | 2.759(4) | 150     |
| O1W–H2W···O2W <sup>v</sup>      | 0.91 | 2.46  | 3.357(6) | 169     |
| O2W–H4W···O2'B <sup>i</sup>     | 0.84 | 1.93  | 2.770(4) | 178     |
| O2W–H3W···O1W                   | 0.84 | 2.08  | 2.746(5) | 136     |
| O3W–H5W···O2A <sup>iv</sup>     | 0.84 | 1.90  | 2.733(5) | 170     |
| O3W–H6W···O2W <sup>vi</sup>     | 0.84 | 2.01  | 2.735(5) | 145     |
| N3A–H3A···O12B <sup>vii</sup>   | 0.88 | 1.80  | 2.628(4) | 155     |
| N4A–H42A···O11A <sup>viii</sup> | 0.88 | 1.91  | 2.778(4) | 168     |
| N4A–H41A···O12B <sup>vii</sup>  | 0.88 | 2.13  | 2.853(4) | 140     |
| N3B–H3B···O12A <sup>ix</sup>    | 0.88 | 1.81  | 2.633(4) | 155     |
| N4B–H42B···O11B <sup>x</sup>    | 0.88 | 1.91  | 2.779(4) | 172     |
| N4B–H41B···O12A <sup>ix</sup>   | 0.88 | 2.14  | 2.864(4) | 139     |
| C6A–H6A···O13A                  | 0.95 | 2.51  | 3.313(5) | 143     |
| C6B–H6B···O13B                  | 0.95 | 2.49  | 3.321(5) | 147     |

Symmetry codes: (i)  $-x+1/2, -y, z-1/2$ ; (ii)  $x, y, z+1$ ; (iii)  $-x+1/2, -y, z+1/2$ ; (iv)  $x+1, y, z$ ; (v)  $-x+3/2, -y, z+1/2$ ; (vi)  $-x+3/2, -y, z-1/2$ ; (vii)  $x-1, y, z-1$ ; (viii)  $x-1/2, -y+1/2, -z$ ; (ix)  $x-1, y, z$ ; (x)  $x-1/2, -y+1/2, -z+1$ .

**Table S12.** Geometric parameters (Å, °) of the hydrogen bonds for high-temperature phase of orthorhombic crystal CMP·1.5H<sub>2</sub>O (**VII<sub>HT</sub>**).

| D–H···A                     | D–H  | H···A | D···A    | D–H···A |
|-----------------------------|------|-------|----------|---------|
| O13–H13···O11 <sup>i</sup>  | 0.84 | 1.79  | 2.612(4) | 166     |
| O2'–H2O···O3 <sup>ii</sup>  | 0.84 | 1.92  | 2.740(5) | 166     |
| O3'–H3O···O1W               | 0.84 | 1.80  | 2.60(2)  | 159     |
| O3'–H3O···O1X               | 0.84 | 1.81  | 2.65(2)  | 177     |
| O1–H2W···O2 <sup>iii</sup>  | 0.84 | 1.88  | 2.71(2)  | 166     |
| O1X–H2X···O2 <sup>iii</sup> | 0.84 | 2.00  | 2.79(2)  | 157     |
| O2W–H3W···O2 <sup>iii</sup> | 0.84 | 1.91  | 2.733(9) | 166     |
| N3–H3···O12 <sup>iv</sup>   | 0.88 | 1.80  | 2.625(5) | 156     |
| N4–H42···O11 <sup>v</sup>   | 0.88 | 1.91  | 2.779(5) | 171     |
| N4–H41···O12 <sup>iv</sup>  | 0.88 | 2.14  | 2.869(5) | 140     |
| C6–H6···O13                 | 0.95 | 2.53  | 3.364(5) | 146     |

Symmetry codes: (i)  $x, y, z+1$ ; (ii)  $-x+1, -y, z$ ; (iii)  $x+1, y, z$ ; (iv)  $x-1, y, z-1$ ; (v)  $x-1/2, -y+1/2, -z+1$ .

**Table S13.** Geometric parameters (Å, °) of the hydrogen bonds for orthorhombic crystal CMP·H<sub>2</sub>O (**VIII**).

| D–H···A                      | D–H  | H···A | D···A     | D–H···A |
|------------------------------|------|-------|-----------|---------|
| O13–H13···O12 <sup>i</sup>   | 0.84 | 1.79  | 2.593(6)  | 160     |
| O2'–H2O···O2 <sup>ii</sup>   | 0.84 | 2.24  | 2.832(5)  | 128     |
| O3'–H3O···O1W <sup>iii</sup> | 0.84 | 1.78  | 2.531(14) | 148     |
| O3'–H3O···O1X <sup>iii</sup> | 0.84 | 1.88  | 2.674(15) | 157     |
| O1W–H2W···O2 <sup>iv</sup>   | 0.84 | 1.94  | 2.728(15) | 157     |
| O1W–H1W···O3'                | 0.84 | 1.99  | 2.757(16) | 150     |
| O1X–H2X···O2 <sup>iv</sup>   | 0.84 | 1.94  | 2.743(14) | 160     |
| O1X–H1X···O3'                | 0.84 | 1.99  | 2.770(14) | 155     |
| N3–H3···O11 <sup>v</sup>     | 0.88 | 1.78  | 2.615(8)  | 159     |
| N4–H41···O11 <sup>v</sup>    | 0.88 | 2.20  | 2.918(8)  | 138     |
| N4–H42···O12 <sup>vi</sup>   | 0.88 | 1.88  | 2.757(8)  | 172     |
| C6–H6···O13                  | 0.95 | 2.47  | 3.268(9)  | 141     |
| C3'–H3'···O4 <sup>vii</sup>  | 1.00 | 2.55  | 3.252(9)  | 127     |
| C4'–H4'···O3 <sup>i</sup>    | 1.00 | 2.47  | 3.316(10) | 143     |

Symmetry codes: (i)  $x, y, z+1$ ; (ii)  $-x+1/2, -y, z+1/2$ ; (iii)  $-x+3/2, -y, z+1/2$ ; (iv)  $x+1, y, z$ ; (v)  $x-1, y, z-1$ ; (vi)  $x-1/2, -y+1/2, -z+1$ ; (vii)  $x, y, z-1$ .

**Table S14.** Geometric parameters (Å, °) of the hydrogen bonds for orthorhombic crystal CMP (IX).

| D–H...A                      | D–H  | H...A | D...A     | D–H...A |
|------------------------------|------|-------|-----------|---------|
| O13–H13...O11 <sup>i</sup>   | 0.84 | 1.97  | 2.620(13) | 133     |
| O2'–H2O...O2 <sup>ii</sup>   | 0.84 | 2.28  | 2.885(13) | 130     |
| O3'–H3O...O3' <sup>iii</sup> | 0.84 | 1.98  | 2.802(12) | 166     |
| N3–H3...O12 <sup>iv</sup>    | 0.88 | 1.85  | 2.657(15) | 152     |
| N4–H42...O11 <sup>v</sup>    | 0.88 | 1.92  | 2.789(15) | 170     |
| N4–H41...O12 <sup>iv</sup>   | 0.88 | 2.10  | 2.821(17) | 139     |
| C6–H6...O13                  | 0.95 | 2.59  | 3.393(16) | 142     |
| C2'–H2'...O2' <sup>vi</sup>  | 1.00 | 2.51  | 3.233(19) | 129     |
| C4'–H4'...O3' <sup>vii</sup> | 1.00 | 2.49  | 3.293(16) | 137     |

Symmetry codes: (i)  $x, y, z+1$ ; (ii)  $-x+1/2, -y, z+1/2$ ; (iii)  $-x+3/2, -y, z-1/2$ ; (iv)  $x-1, y, z-1$ ; (v)  $x-1/2, -y+1/2, -z+1$ ; (vi)  $-x+1/2, -y, z-1/2$ ; (vii)  $-x+3/2, -y, z+1/2$ .

**Table S15.** Lone pair (lp)⋯ $\pi$  distances (Å) between oxygen atoms of ribose (O4') and phosphate (O11 or O12) and cytosine ring for triclinic crystals CMP·2H<sub>2</sub>O (**I**), CMP·H<sub>2</sub>O (**II**), CMP·0.5H<sub>2</sub>O (**III**), CMP (**IV**), monoclinic crystals CMP·H<sub>2</sub>O (WIWZOV) (**V**), CMP (**VI**) and orthorhombic crystals CMP·1.5H<sub>2</sub>O (**VII\_LT**), CMP·1.5H<sub>2</sub>O (**VII\_HT**), CMP·H<sub>2</sub>O (**VIII**) and CMP (**IX**).

|                   | lp oxygen atom      | lp⋯centroid | lp⋯plane  |
|-------------------|---------------------|-------------|-----------|
| <b>I</b>          | O4' <sup>ri</sup>   | 3.362(2)    | 3.147(2)  |
|                   | O12 <sup>ii</sup>   | 2.989(2)    | 2.879(2)  |
| <b>II</b>         | O4' <sup>ri</sup>   | 3.461(12)   | 3.112(12) |
|                   | O11 <sup>ii</sup>   | 2.945(11)   | 2.927(11) |
| <b>III (A)</b>    | O4'A <sup>iii</sup> | 3.323(9)    | 3.078(78) |
|                   | O11A <sup>ii</sup>  | 2.939(8)    | 2.788(8)  |
| <b>III (B)</b>    | O4'B <sup>iii</sup> | 3.267(8)    | 3.079(8)  |
|                   | O11B <sup>ii</sup>  | 2.995(8)    | 2.936(8)  |
| <b>IV</b>         | O4' <sup>iii</sup>  | 3.302(4)    | 3.030(4)  |
|                   | O11 <sup>iv</sup>   | 2.870(4)    | 2.805(4)  |
| <b>V</b>          | O4' <sup>ri</sup>   | 3.484(2)    | 3.210(2)  |
|                   | O12 <sup>iv</sup>   | 2.936(2)    | 2.907(2)  |
| <b>VI</b>         | O4' <sup>ri</sup>   | 3.572(14)   | 3.330(14) |
|                   | O12 <sup>iv</sup>   | 3.048(13)   | 2.999(14) |
| <b>VII_LT (A)</b> | O4'B <sup>v</sup>   | 3.531(3)    | 3.330(3)  |
|                   | O12A <sup>iii</sup> | 3.015(3)    | 2.925(3)  |
| <b>VII_LT (B)</b> | O4'A                | 3.429(3)    | 3.198(3)  |
|                   | O12B <sup>iii</sup> | 3.973(3)    | 2.915(3)  |
| <b>VII_HT</b>     | O4' <sup>rv</sup>   | 3.490(3)    | 3.261(4)  |
|                   | O12 <sup>iii</sup>  | 3.026(4)    | 2.960(4)  |
| <b>VIII</b>       | O4' <sup>rv</sup>   | 3.699(5)    | 3.364(5)  |
|                   | O11 <sup>iii</sup>  | 2.973(5)    | 2.938(5)  |
| <b>IX</b>         | O4' <sup>rv</sup>   | 3.322(94)   | 3.090(91) |
|                   | O12 <sup>iii</sup>  | 2.930(94)   | 2.890(95) |

Symmetry codes: (i)  $x+1, y, z$ ; (ii)  $x, y+1, z$ ; (iii)  $x-1, y, z$ ; (iv)  $x, y-1, z$ ; (v)  $x, y, z-1$ .

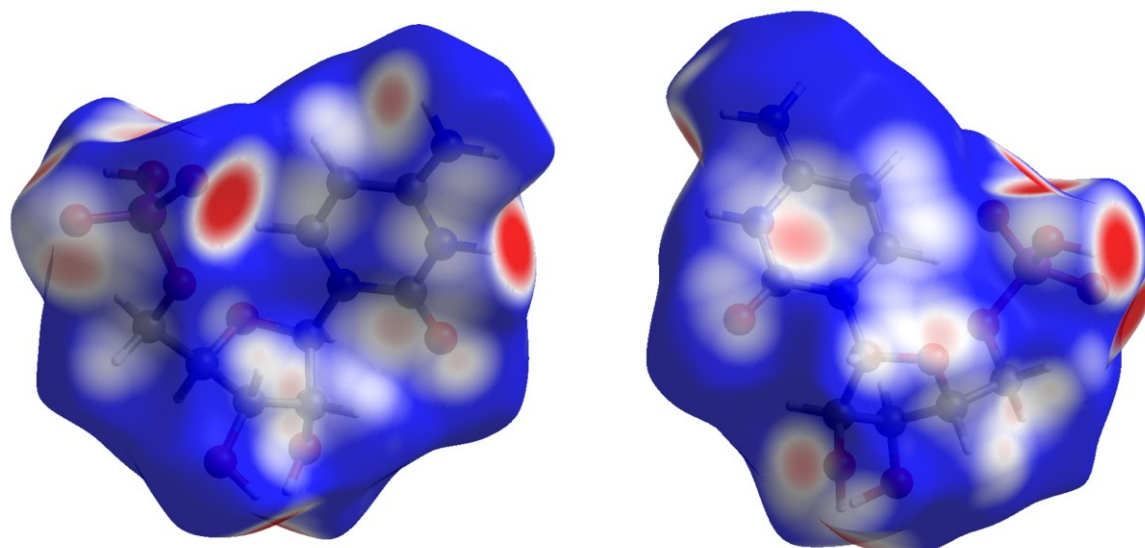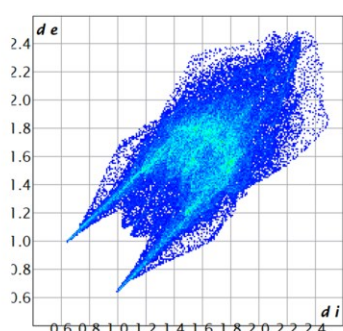

**all contacts**

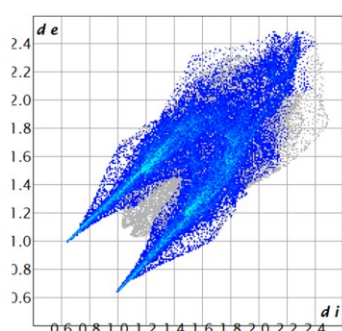

**H...O (22.4%) / O...H (26.4%)**

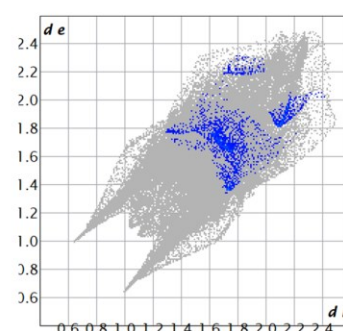

**H...N (1.1%) / N...H (1.6%)**

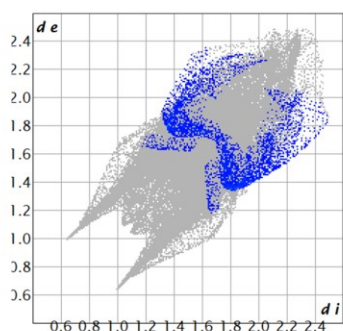

**H...C (2.1%) / C...H (3.0%)**

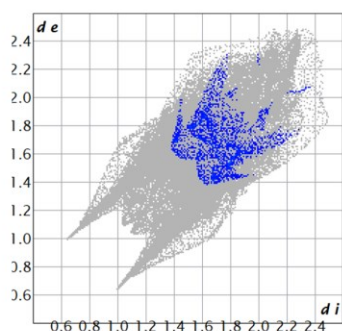

**N...O (1.7%) / O...N (1.5%)**

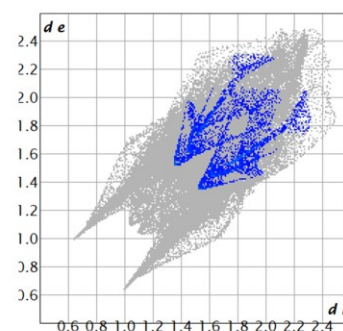

**C...O (2.7%) / O...C (2.3%)**

**Figure S18.** Front and back views of the Hirshfeld surface of the CMP zwitterion in triclinic anhydrous crystal:  $d_{\text{norm}}$  [from  $-0.5$  (blue) to  $0.5$  Å (red)] mapped on the surface (top), and 2D fingerprint plots with selected types of contacts and their contribution to the surface area.

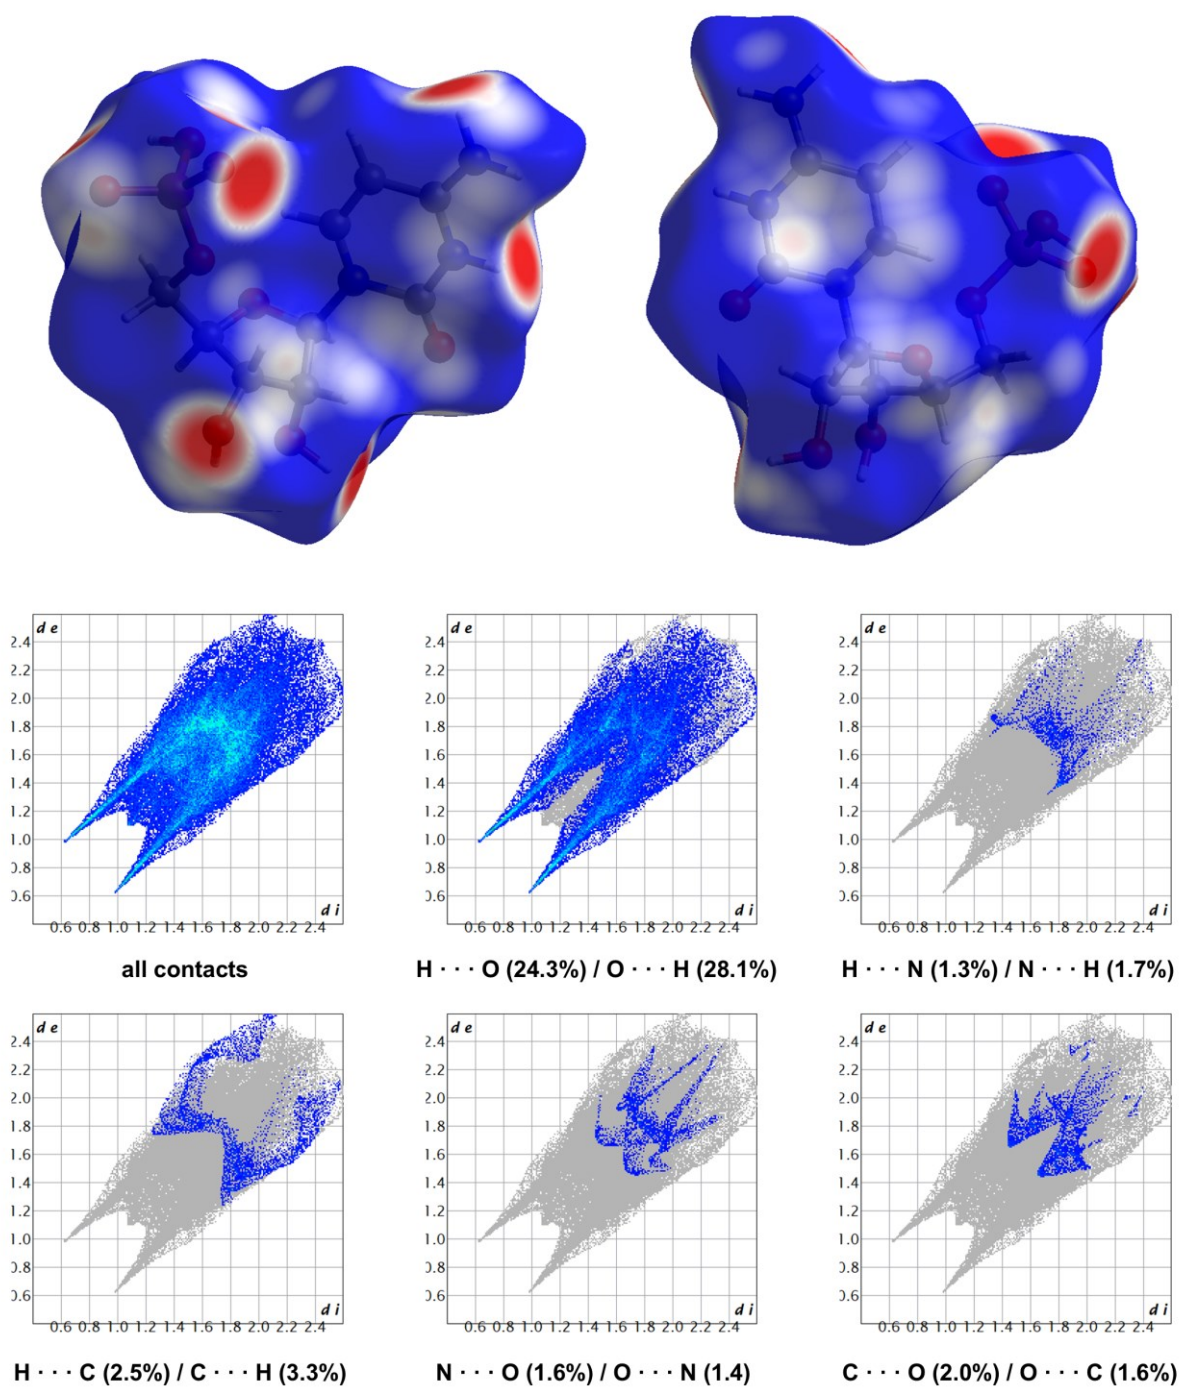

**Figure S19.** Front and back views of the Hirshfeld surface of the CMP zwitterion in monoclinic anhydrous crystal:  $d_{\text{norm}}$  [from  $-0.5$  (blue) to  $0.5$  Å (red)] mapped on the surface (top), and 2D fingerprint plots with selected types of contacts and their contribution to the surface area.



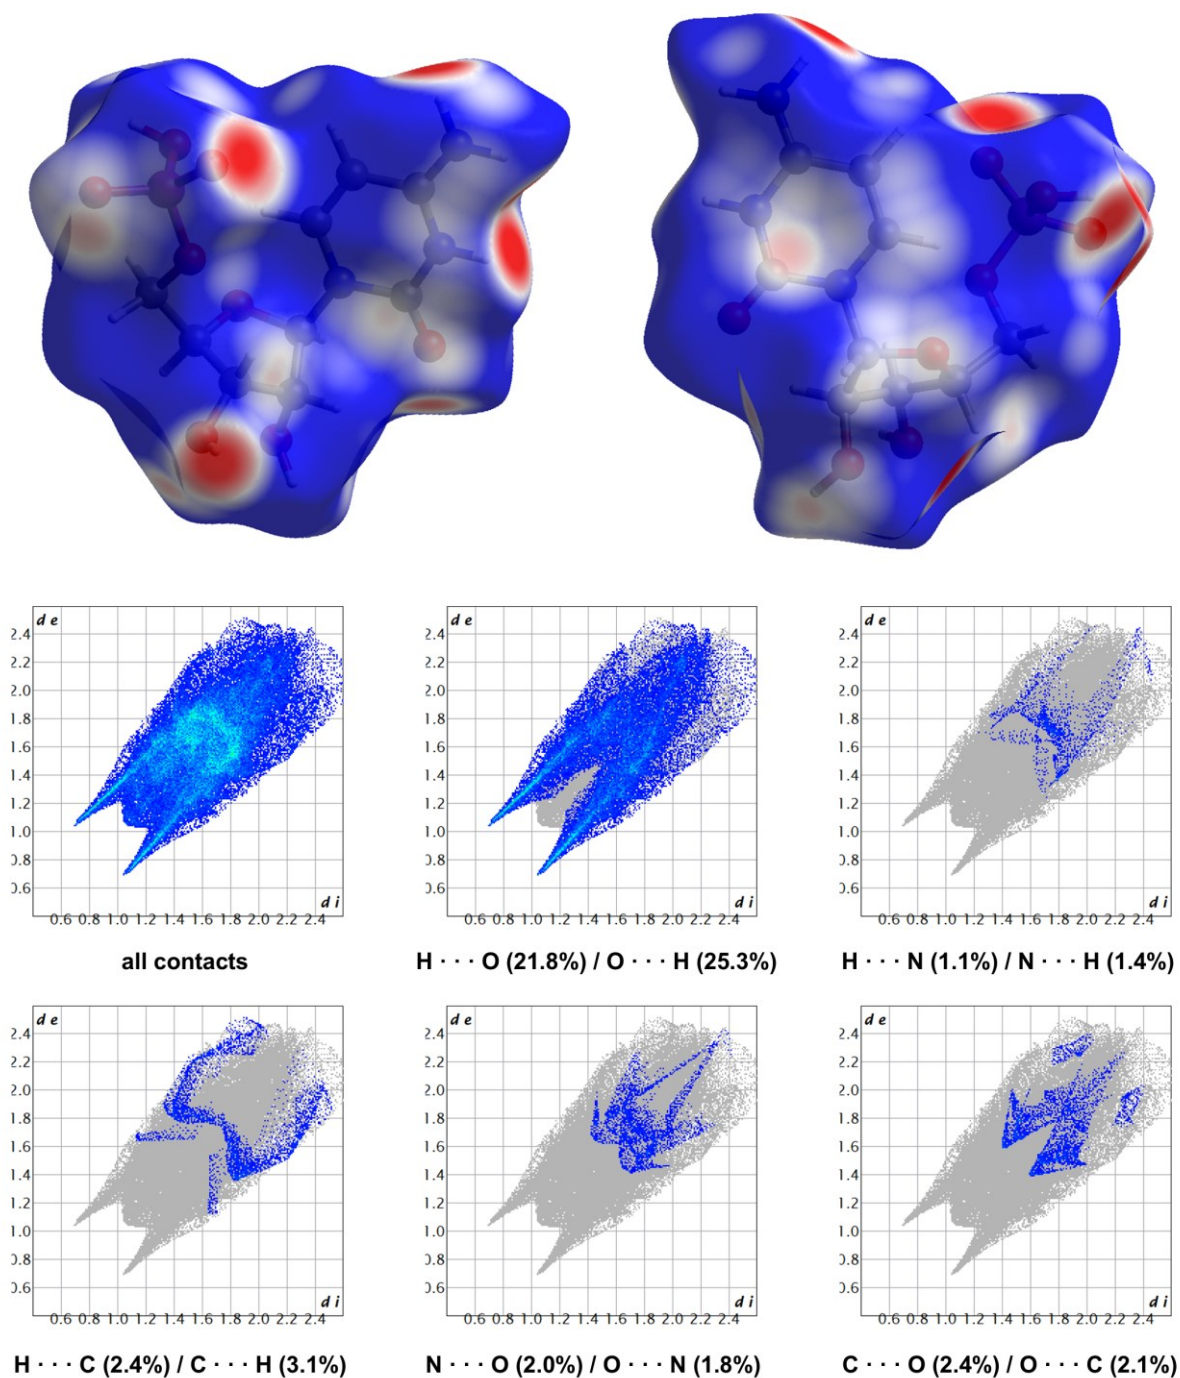

**Figure S20.** Front and back views of the Hirshfeld surface of the CMP zwitterion in orthorhombic anhydrous crystal:  $d_{\text{norm}}$  [from  $-0.5$  (blue) to  $0.5$  Å (red)] mapped on the surface (top), and 2D fingerprint plots with selected types of contacts and their contribution to the surface area.

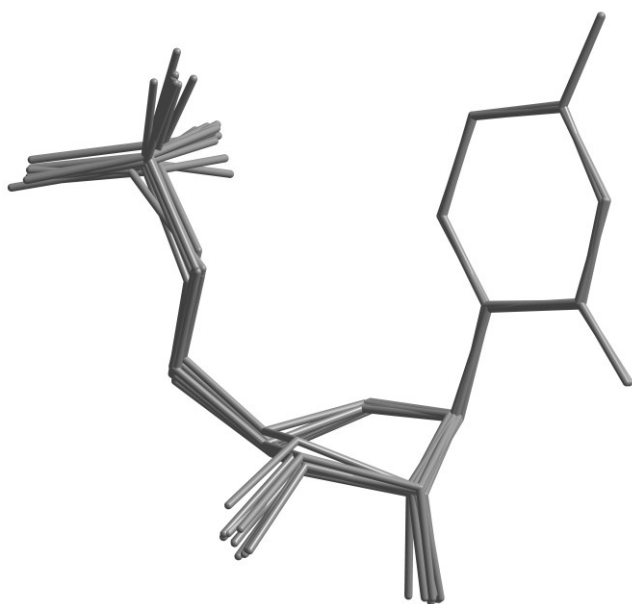

**Figure S21.** Comparison of the conformation of all CMP zwitterions graphically superimposed with cytosine N1, C2, N3, C4, C5 and C6 atoms. Hydrogen atoms were omitted for clarity.

## REFERENCES

---

<sup>1</sup> A. Houlton, L. Mistry, P. G. Waddell, CCDC 2305187: Experimental Crystal Structure Determination, 2023.
